# Supplementary material for: Nipagin-Functionalized Porphyrazine and Phthalocyanine—Synthesis, Physicochemical Characterization and Toxicity Study after Deposition on Titanium Dioxide Nanoparticles P25
Source: MDPI journal article supplement (doi:10.3390/molecules26092657), 2021-05-01
Supplement: s1 [file s1]

*Supplementary Materials for*

**Nipagin-functionalized porphyrazine and phthalocyanine - synthesis, physicochemical characterization and toxicity study after deposition on titanium dioxide nanoparticles P25**

Dariusz T. Mlynarczyk <sup>1,\*</sup>, Daniel Ziental <sup>2</sup>, Emil Kolasinski <sup>1</sup>, Lukasz Sobotta <sup>2</sup>,

Tomasz Koczorowski <sup>1</sup>, Jadwiga Mielcarek <sup>2</sup>, Tomasz Goslinski <sup>1</sup>

<sup>1</sup> *Chair and Department of Chemical Technology of Drugs, Poznan University of Medical Sciences, Grunwaldzka 6, 60-780 Poznań, Poland*

<sup>2</sup> *Chair and Department of Inorganic and Analytical Chemistry, Poznan University of Medical Sciences, Grunwaldzka 6, 60-780 Poznań, Poland*

\*Correspondence to: D.T. Mlynarczyk, Chair and Department of Chemical Technology of Drugs, Poznan University of Medical Sciences, Grunwaldzka 6, 60-780 Poznań, Poland.

Tel.: (+48) 61 854 66 33, Fax: (+48) 61 854 66 39. E-mail: [mlynarczykd@ump.edu.pl](mailto:mlynarczykd@ump.edu.pl)

## TABLE OF CONTENTS

|                                                                                          |            |
|------------------------------------------------------------------------------------------|------------|
| <b>1. EXPERIMENTAL .....</b>                                                             | <b>S3</b>  |
| 1.1. NMR DATA OF <b>1</b> .....                                                          | S3         |
| 1.2. NMR DATA OF <b>2</b> .....                                                          | S5         |
| 1.3. NMR DATA OF <b>3</b> .....                                                          | S7         |
| 1.4. NMR DATA OF <b>4</b> .....                                                          | S9         |
| 1.5. NMR DATA OF <b>4</b> MACROCYCLIZATION PRODUCT – AN UNSYMMETRICAL PORPHYRAZINE ..... | S11        |
| 1.6. NMR DATA OF <b>5</b> .....                                                          | S14        |
| 1.7. NMR DATA OF <b>5D</b> .....                                                         | S16        |
| 1.8. NMR DATA OF <b>6</b> .....                                                          | S18        |
| 1.9. NMR DATA OF <b>7</b> .....                                                          | S20        |
| 1.10. NMR DATA OF <b>8</b> .....                                                         | S22        |
| 1.11. HPLC DATA OF <b>3</b> .....                                                        | S24        |
| 1.12. HPLC DATA OF <b>7</b> .....                                                        | S27        |
| <b>2. SYNTHETIC ATTEMPTS TOWARDS A<sub>3</sub>B TYPE MACROCYCLES.....</b>                | <b>S30</b> |

## 1. Experimental

### 1.1. NMR data of **1**

**Table S1.**  $^1\text{H}$  and  $^{13}\text{C}$  NMR data obtained for **1** including key correlations determined from  $^1\text{H}$ - $^1\text{H}$  COSY,  $^1\text{H}$ - $^{13}\text{C}$  HSQC and  $^1\text{H}$ - $^{13}\text{C}$  HMBC spectra.

| $\delta_{\text{H}}$<br>(ppm) | Multiplicity<br>( $J_{\text{H-H}}$ in Hz) | $^1\text{H}$ - $^1\text{H}$ COSY<br>$\delta_{\text{H}}$ (ppm) | $^1\text{H}$ - $^{13}\text{C}$ HSQC<br>$\delta_{\text{C}}$ (ppm) | $^1\text{H}$ - $^{13}\text{C}$ HMBC<br>$\delta_{\text{C}}$ (ppm) |                |       |
|------------------------------|-------------------------------------------|---------------------------------------------------------------|------------------------------------------------------------------|------------------------------------------------------------------|----------------|-------|
| 7.90                         | d (9.0)                                   | 7.03                                                          | 131.1                                                            | 165.3<br>122.1                                                   | 162.3<br>114.3 | 131.1 |
| 7.03                         | d (9.0)                                   | 7.90                                                          | 114.3                                                            | 165.3<br>122.1                                                   | 162.3<br>114.3 | 131.1 |
| 4.25                         | q (7.0)                                   | 1.29                                                          | 60.2                                                             | 165.3<br>66.9                                                    | 122.1<br>14.2  | 114.3 |
| 4.07                         | t (6.5)                                   | 1.84                                                          | 66.9                                                             | 162.3                                                            | 29.0           | 27.2  |
| 3.59                         | t (6.5)                                   | 1.96                                                          | 34.6                                                             | 29.0                                                             | 27.2           |       |
| 1.96                         | m                                         | 3.59 1.84                                                     | 29.0                                                             | 66.9                                                             | 34.6           | 27.2  |
| 1.84                         | m                                         | 4.07 1.96                                                     | 27.2                                                             | 66.9                                                             | 34.6           | 29.0  |
| 1.29                         | t (7.0)                                   | 4.25                                                          | 14.2                                                             | 162.3                                                            | 122.1          | 60.2  |

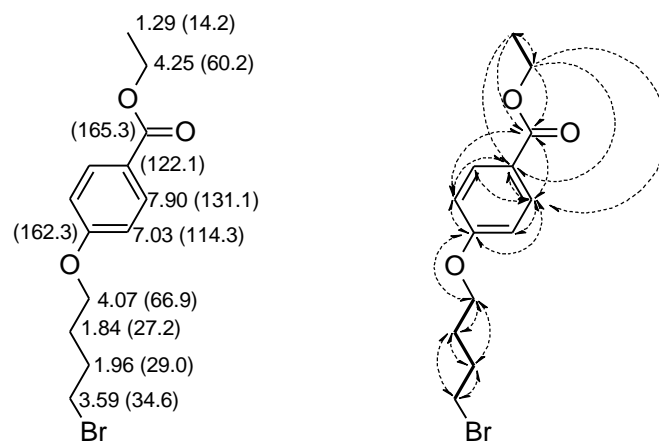

**Fig. S1.**  $^1\text{H}$  and ( $^{13}\text{C}$ ) chemical shift values [ppm] and key correlations observed in NMR spectra of **1**.  
Bold lines:  $^1\text{H}$ - $^1\text{H}$  COSY; Arrows:  $^1\text{H}$ - $^{13}\text{C}$  HMBC.

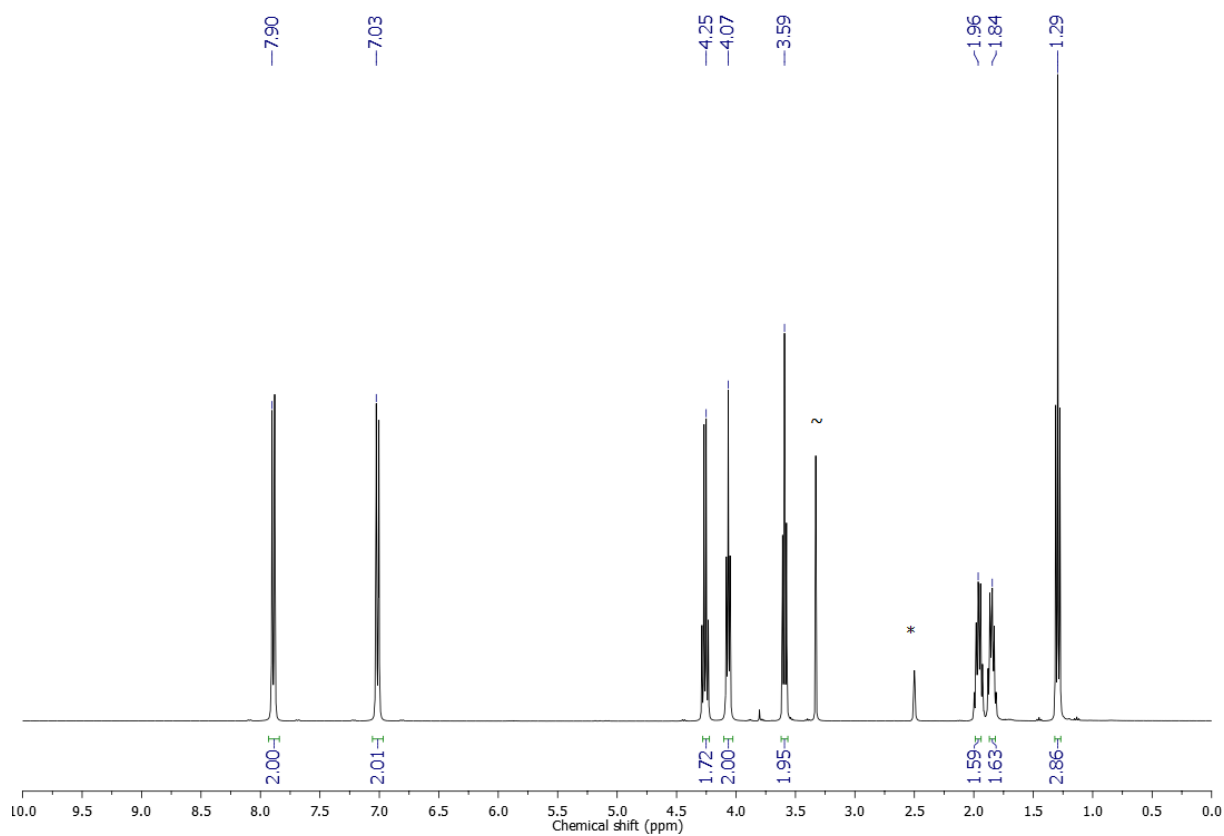

**Fig. S2.**  $^1\text{H}$  NMR spectrum of **1** (400 MHz,  $\text{DMSO-}d_6$ , 298 K). The symbols \* and ~ indicate  $\text{DMSO-}d_6$  and water residual peaks, respectively.

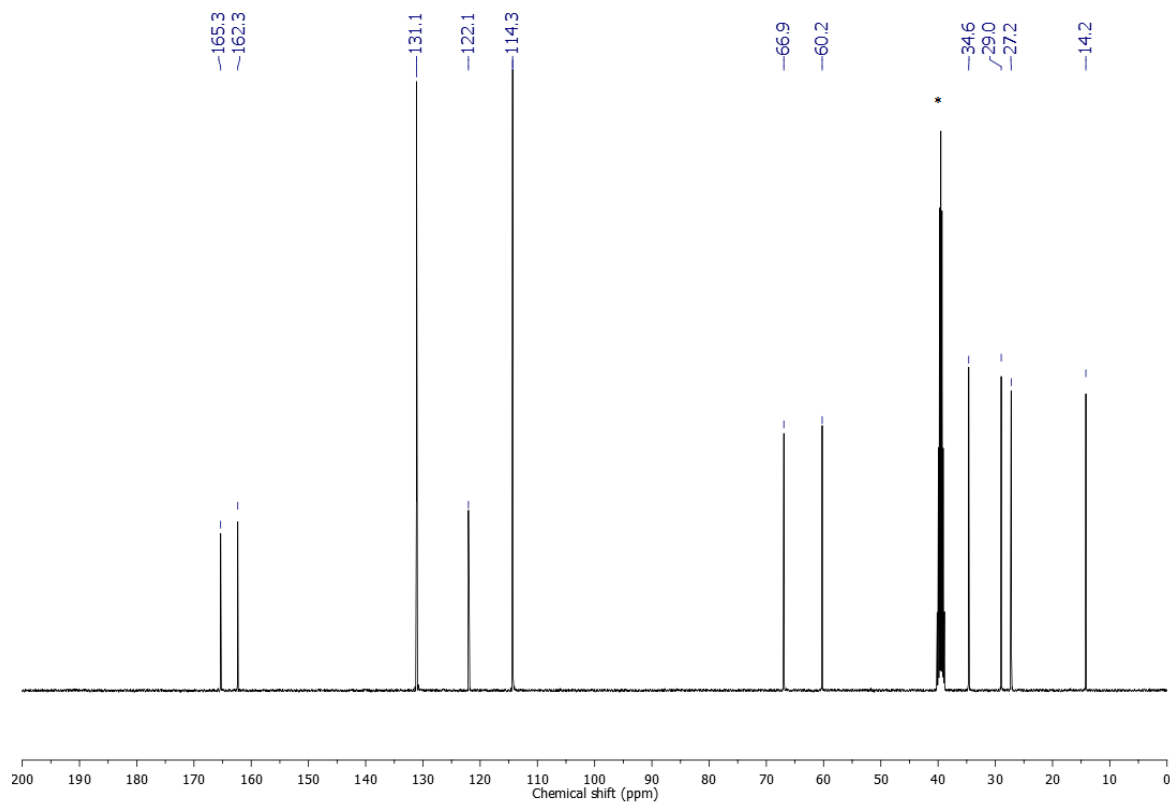

**Fig. S3.**  $^{13}\text{C}$  NMR spectrum recorded for **1** (101 MHz,  $\text{DMSO-}d_6$ , 298 K). The symbol \* indicates  $\text{DMSO-}d_6$  residual peak.

## 1.2. NMR data of 2

**Table S2.**  $^1\text{H}$  and  $^{13}\text{C}$  NMR data obtained for **2** including key correlations determined from  $^1\text{H}$ – $^1\text{H}$  COSY,  $^1\text{H}$ – $^{13}\text{C}$  HSQC and  $^1\text{H}$ – $^{13}\text{C}$  HMBC spectra.

| $\delta_{\text{H}}$<br>(ppm) | Multiplicity<br>( $J_{\text{H-H}}$ in Hz) | $^1\text{H}$ – $^1\text{H}$ COSY<br>$\delta_{\text{H}}$ (ppm) | $^1\text{H}$ – $^{13}\text{C}$ HSQC<br>$\delta_{\text{C}}$ (ppm) | $^1\text{H}$ – $^{13}\text{C}$ HMBC<br>$\delta_{\text{C}}$ (ppm) |       |       |       |
|------------------------------|-------------------------------------------|---------------------------------------------------------------|------------------------------------------------------------------|------------------------------------------------------------------|-------|-------|-------|
| 7.89                         | d (8.5)                                   | 7.02                                                          | 131.1                                                            | 165.4                                                            | 162.4 | 131.1 | 114.4 |
| 7.61                         | s                                         | -                                                             | 120.5                                                            | 154.8                                                            | 113.5 | 102.8 |       |
| 7.02                         | d (8.5)                                   | 7.89                                                          | 114.4                                                            | 162.4                                                            | 122.0 | 114.4 |       |
| 4.25                         | m                                         | 1.30                                                          | 60.3                                                             | 165.4                                                            | 14.2  |       |       |
| 4.23                         | m                                         | 1.91                                                          | 69.5                                                             | 154.8                                                            | 25.0  |       |       |
| 4.14                         | m                                         | 1.91                                                          | 67.4                                                             | 162.4                                                            | 25.0  |       |       |
| 1.91                         | m                                         | 4.23 4.14                                                     | 25.0                                                             | 69.5                                                             | 67.4  |       |       |
| 1.30                         | t (7.0)                                   | 4.25                                                          | 14.2                                                             | 60.3                                                             |       |       |       |

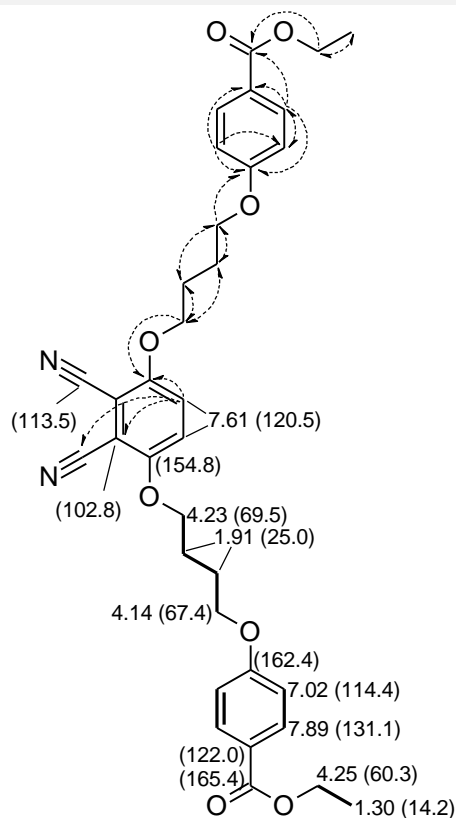

**Fig. S4.**  $^1\text{H}$  and ( $^{13}\text{C}$ ) chemical shift values [ppm] and key correlations observed in NMR spectra of **2**.  
Bold lines:  $^1\text{H}$ – $^1\text{H}$  COSY; Arrows:  $^1\text{H}$ – $^{13}\text{C}$  HMBC.

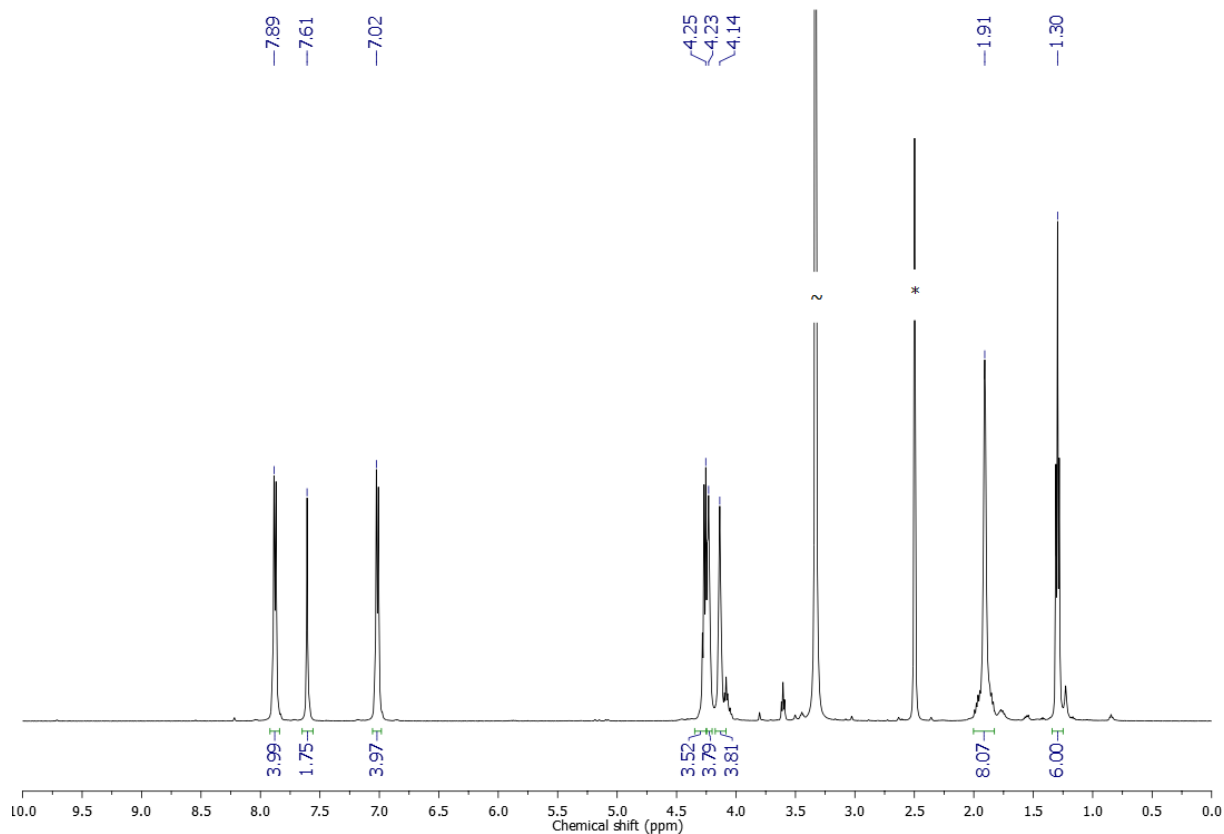

**Fig. S5.**  $^1\text{H}$  NMR spectrum of **2** (500 MHz,  $\text{DMSO-}d_6$ , 298 K). The symbols \* and ~ indicate  $\text{DMSO-}d_6$  and water residual peaks, respectively.

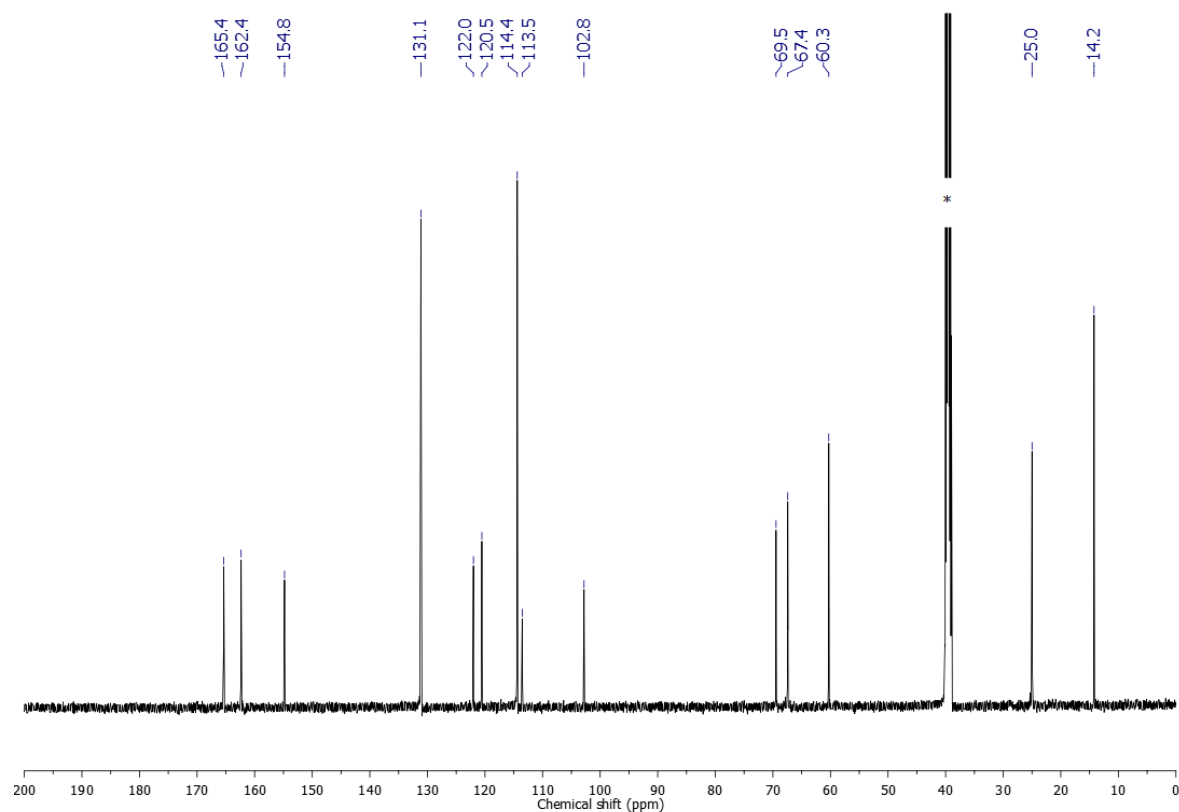

**Fig. S6.**  $^{13}\text{C}$  NMR spectrum recorded for **2** (126 MHz,  $\text{DMSO-}d_6$ , 298 K). The symbol \* indicates  $\text{DMSO-}d_6$  residual peak.

### 1.3. NMR data of **3**

**Table S3.**  $^1\text{H}$  and  $^{13}\text{C}$  NMR data obtained for **3** including key correlations determined from  $^1\text{H}$ – $^1\text{H}$  COSY,  $^1\text{H}$ – $^{13}\text{C}$  HSQC and  $^1\text{H}$ – $^{13}\text{C}$  HMBC spectra.

| $\delta_{\text{H}}$<br>(ppm) | Multiplicity<br>( $J_{\text{H-H}}$ in Hz) | $^1\text{H}$ – $^1\text{H}$ COSY<br>$\delta_{\text{H}}$ (ppm) | $^1\text{H}$ – $^{13}\text{C}$ HSQC<br>$\delta_{\text{C}}$ (ppm) | $^1\text{H}$ – $^{13}\text{C}$ HMBC<br>$\delta_{\text{C}}$ (ppm) |       |       |       |
|------------------------------|-------------------------------------------|---------------------------------------------------------------|------------------------------------------------------------------|------------------------------------------------------------------|-------|-------|-------|
| 8.09                         | d (9.0)                                   | 7.04                                                          | 132.3                                                            | 166.7<br>115.1                                                   | 163.8 | 132.3 | 123.6 |
| 7.90                         | s                                         | -                                                             | 119.9                                                            | 153.8                                                            | 152.6 | 130.4 |       |
| 7.04                         | d (9.0)                                   | 8.09                                                          | 115.1                                                            | 166.7                                                            | 163.8 | 123.6 |       |
| 5.24                         | t (6.5)                                   | 2.52                                                          | 73.0                                                             | 152.6                                                            | 27.3  |       |       |
| 4.29                         | t (6.5)                                   | 1.60                                                          | 65.0                                                             | 166.7                                                            | 132.3 | 19.9  |       |
| 4.26                         | t (6.5)                                   | 2.31                                                          | 68.9                                                             | 163.8                                                            | 27.1  |       |       |
| 2.52                         | m                                         | 5.24 2.31                                                     | 27.3                                                             | 73.0                                                             | 68.9  | 27.1  |       |
| 2.31                         | m                                         | 4.26 2.52                                                     | 27.1                                                             | 73.0                                                             | 68.9  | 27.3  |       |
| 1.60                         | m                                         | 4.29 1.34                                                     | 31.5                                                             | 65.0                                                             | 19.9  | 14.3  |       |
| 1.34                         | m                                         | 1.60 0.84                                                     | 19.9                                                             | 65.0                                                             | 31.5  | 14.3  |       |
| 0.85                         | t (7.5)                                   | 1.34                                                          | 14.3                                                             | 31.5                                                             | 19.9  |       |       |

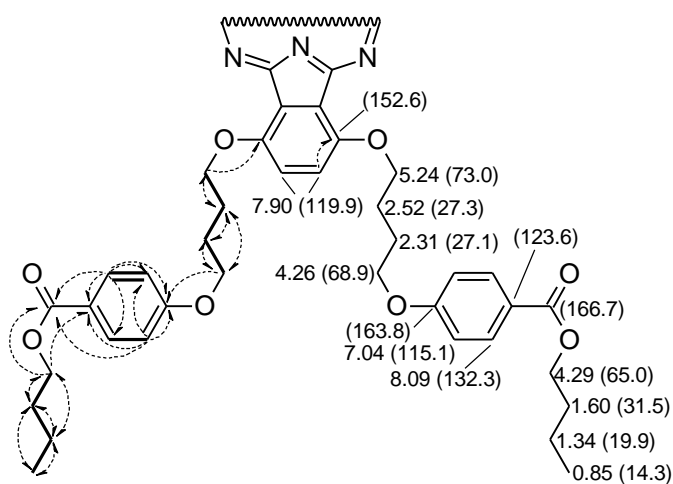

**Fig. S7.**  $^1\text{H}$  and ( $^{13}\text{C}$ ) chemical shift values [ppm] and key correlations observed in NMR spectra of **3**.  
Bold lines:  $^1\text{H}$ – $^1\text{H}$  COSY; Arrows:  $^1\text{H}$ – $^{13}\text{C}$  HMBC.

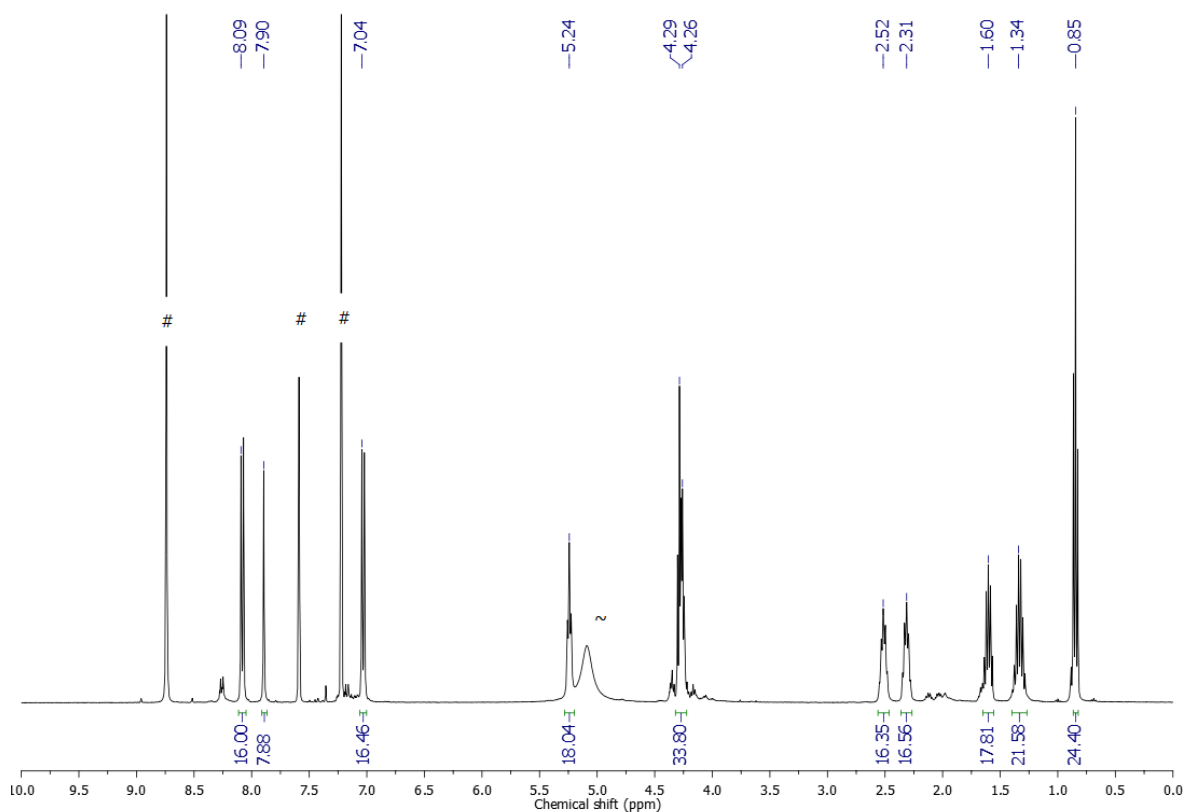

**Fig. S8.**  $^1\text{H}$  NMR spectrum of **3** (500 MHz, pyridine- $d_5$ , 298 K). The symbols # and ~ indicate pyridine- $d_5$  and water residual peaks, respectively.

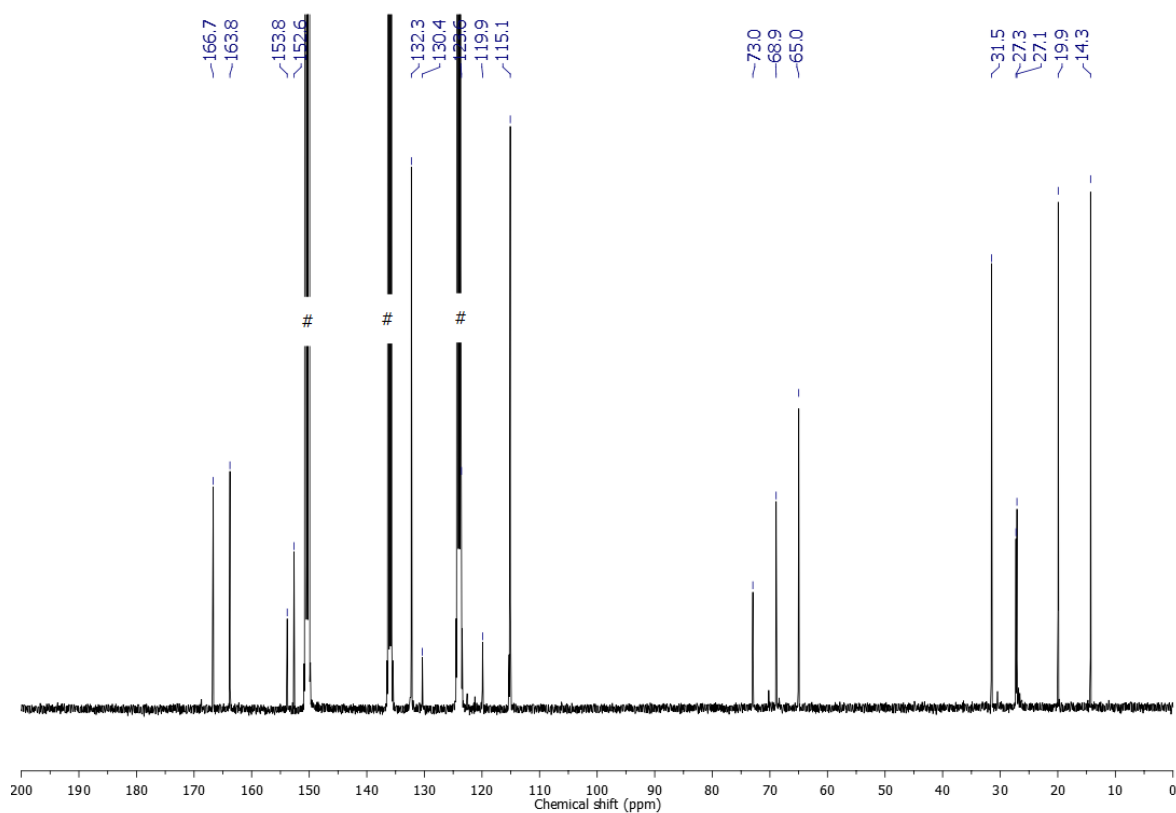

**Fig. S9.**  $^{13}\text{C}$  NMR spectrum recorded for **3** (126 MHz, pyridine- $d_5$ , 298 K). The symbols # indicate pyridine- $d_5$  residual peaks.



#### 1.4. NMR data of **4**

**Table S4.**  $^1\text{H}$  and  $^{13}\text{C}$  NMR data obtained for **4** including key correlations determined from  $^1\text{H}$ – $^1\text{H}$  COSY,  $^1\text{H}$ – $^{13}\text{C}$  HSQC and  $^1\text{H}$ – $^{13}\text{C}$  HMBC spectra.

| $\delta_{\text{H}}$<br>(ppm)     | Multiplicity<br>( $J_{\text{H-H}}$ in Hz) | $^1\text{H}$ – $^1\text{H}$ COSY<br>$\delta_{\text{H}}$ (ppm) | $^1\text{H}$ – $^{13}\text{C}$ HSQC<br>$\delta_{\text{C}}$ (ppm) | $^1\text{H}$ – $^{13}\text{C}$ HMBC<br>$\delta_{\text{C}}$ (ppm) |       |       |       |
|----------------------------------|-------------------------------------------|---------------------------------------------------------------|------------------------------------------------------------------|------------------------------------------------------------------|-------|-------|-------|
| 7.89                             | d (9.0)                                   | 6.99                                                          | 131.1                                                            | 165.3<br>114.3                                                   | 162.3 | 131.1 | 122.0 |
| 6.99                             | d (9.0)                                   | 7.89                                                          | 114.3                                                            | 165.3<br>114.3                                                   | 162.3 | 131.1 | 122.0 |
| 4.26                             | q (7.0)                                   | 4.26 1.29                                                     | 60.2                                                             | 165.3                                                            | 122.0 | 14.1  |       |
| 4.05                             | t (5.5)                                   | 4.05 1.82                                                     | 67.0                                                             | 162.3                                                            | 27.1  | 26.1  |       |
| 3.23                             | t (6.5)                                   | 3.23 1.82                                                     | 34.1                                                             | 121.1                                                            | 67.0  | 27.1  | 26.1  |
| 1.82                             | m                                         | 4.05 3.23 1.82                                                | 27.1 26.1                                                        | 67.0                                                             | 34.1  | 27.1  | 26.1  |
| 1.29                             | t (7.5)                                   | 4.26 1.29                                                     | 14.1                                                             | 60.2                                                             |       |       |       |
| Other carbon atoms (ppm): 112.3. |                                           |                                                               |                                                                  |                                                                  |       |       |       |

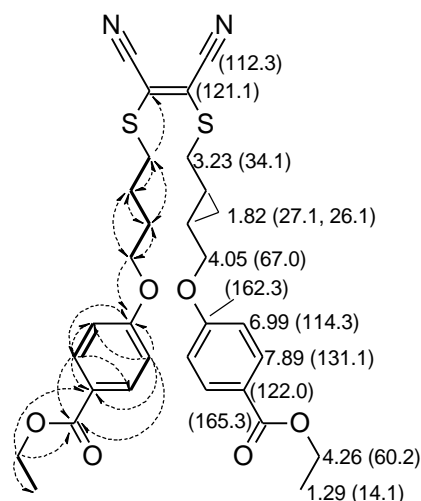

**Fig. S10.**  $^1\text{H}$  and ( $^{13}\text{C}$ ) chemical shift values [ppm] and key correlations observed in NMR spectra of **4**.  
Bold lines:  $^1\text{H}$ – $^1\text{H}$  COSY; Arrows:  $^1\text{H}$ – $^{13}\text{C}$  HMBC.

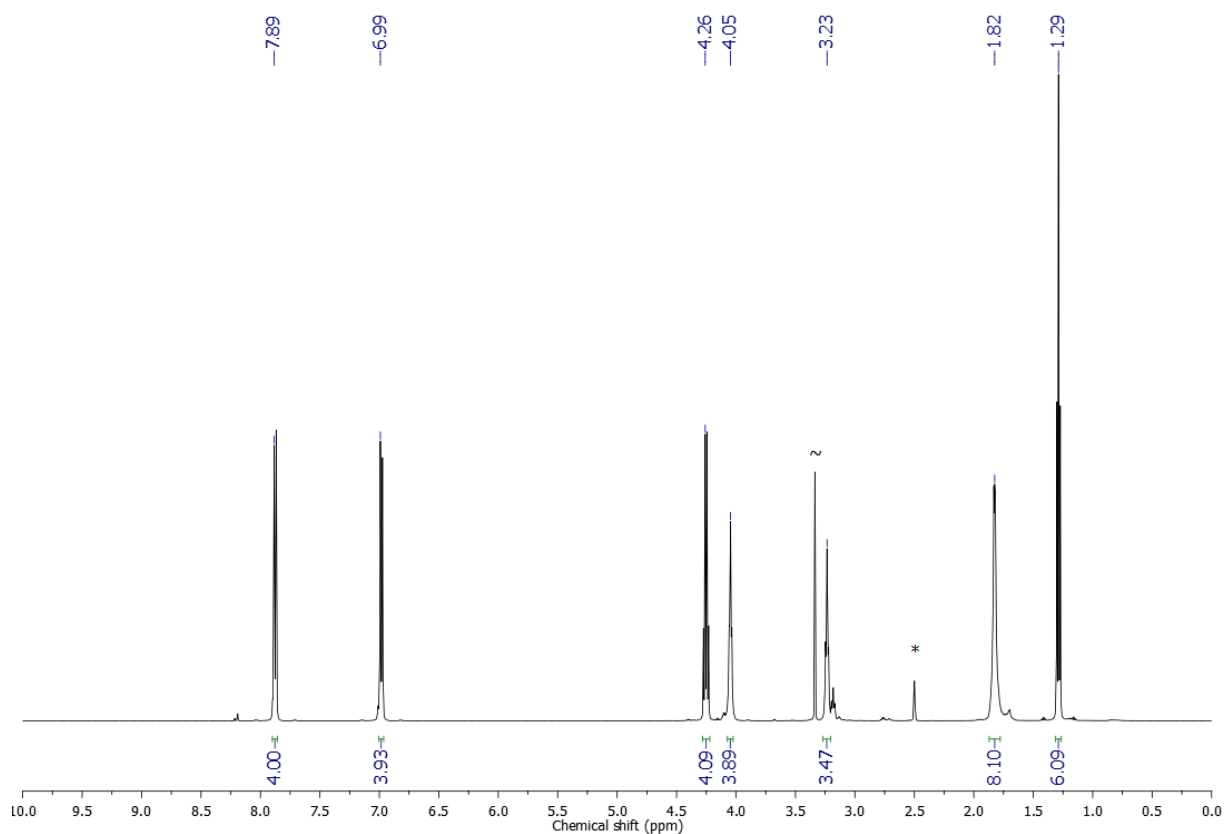

**Fig. S11.**  $^1\text{H}$  NMR spectrum of **4** (400 MHz,  $\text{DMSO-}d_6$ , 298 K). The symbols \* and ~ indicate  $\text{DMSO-}d_6$  and water residual peaks, respectively.

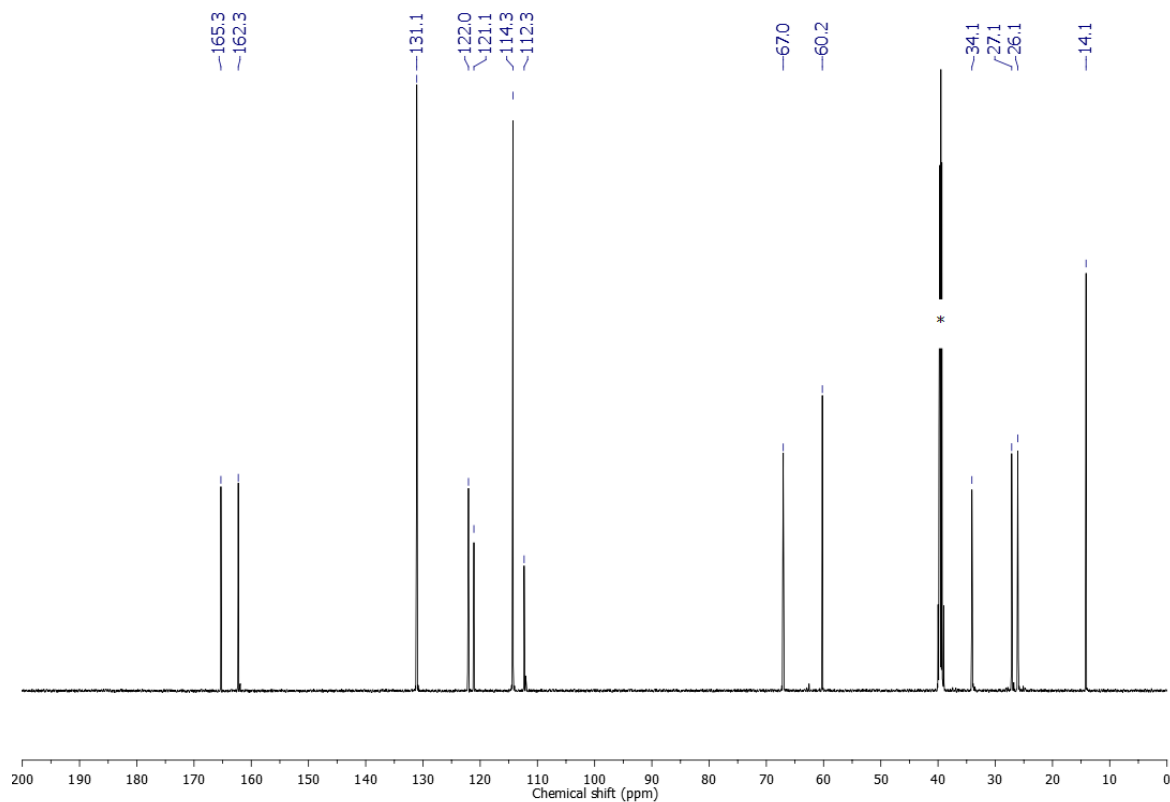

**Fig. S12.**  $^{13}\text{C}$  NMR spectrum recorded for **4** (101 MHz,  $\text{DMSO-}d_6$ , 298 K). The symbol \* indicates  $\text{DMSO-}d_6$  residual peak.

**1.5. NMR data of 4 macrocyclization product – an unsymmetrical porphyrazine**

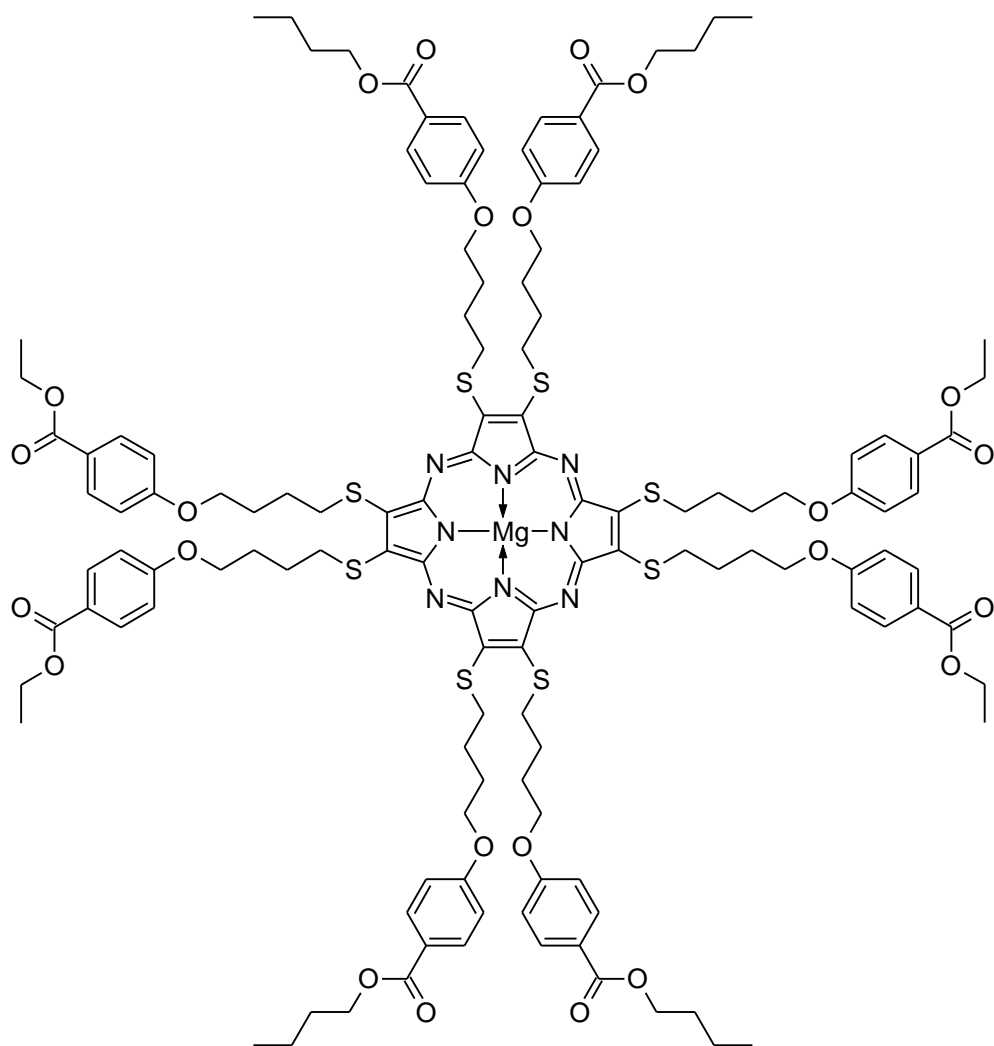

**Fig. S13.** Presumed structure of **4** macrocyclization product.

**Table S5.**  $^1\text{H}$  and  $^{13}\text{C}$  NMR data obtained for the product of **4** macrocyclization including key correlations determined from  $^1\text{H}$ - $^1\text{H}$  COSY,  $^1\text{H}$ - $^{13}\text{C}$  HSQC and  $^1\text{H}$ - $^{13}\text{C}$  HMBC spectra.

| $\delta_{\text{H}}$<br>(ppm)      | Multiplicity<br>( $J_{\text{H-H}}$ in Hz) | $^1\text{H}$ - $^1\text{H}$ COSY<br>$\delta_{\text{H}}$ (ppm) | $^1\text{H}$ - $^{13}\text{C}$ HSQC<br>$\delta_{\text{C}}$ (ppm) | $^1\text{H}$ - $^{13}\text{C}$ HMBC<br>$\delta_{\text{C}}$ (ppm) |
|-----------------------------------|-------------------------------------------|---------------------------------------------------------------|------------------------------------------------------------------|------------------------------------------------------------------|
| 8.14                              | d (8.5)                                   | 6.98                                                          | 132.30                                                           | 166.69<br>115.04                                                 |
| 8.10                              | d (8.5)                                   | 6.95                                                          | 132.29                                                           | 166.62<br>114.99                                                 |
| 6.98                              | d (8.5)                                   | 8.14                                                          | 115.04                                                           | 166.69<br>115.04                                                 |
| 6.95                              | d (8.5)                                   | 8.10                                                          | 114.99                                                           | 166.62<br>114.99                                                 |
| 4.51                              | s                                         | 2.26                                                          | 35.67                                                            | 141.61<br>27.98                                                  |
| 4.33                              | q (7.0)                                   | 1.64 1.26                                                     | 65.05 61.20                                                      | 166.69<br>14.91                                                  |
| 4.06                              | m                                         | 2.26                                                          | 68.48 68.47                                                      | 163.61<br>27.98                                                  |
| 2.26                              | bs                                        | 4.06 2.26 4.51                                                | 29.22 27.98                                                      | 68.48<br>27.98                                                   |
| 1.64                              | m                                         | 4.33 1.36                                                     | 31.53                                                            | 65.05                                                            |
| 1.36                              | m                                         | 1.64 0.86                                                     | 19.95                                                            | 65.05                                                            |
| 1.26                              | t (7.0)                                   | 4.33                                                          | 14.91                                                            | 61.20                                                            |
| 0.86                              | t (7.5)                                   | 0.86                                                          | 14.32                                                            | 31.53                                                            |
| Other carbon atoms (ppm): 158.35. |                                           |                                                               |                                                                  |                                                                  |

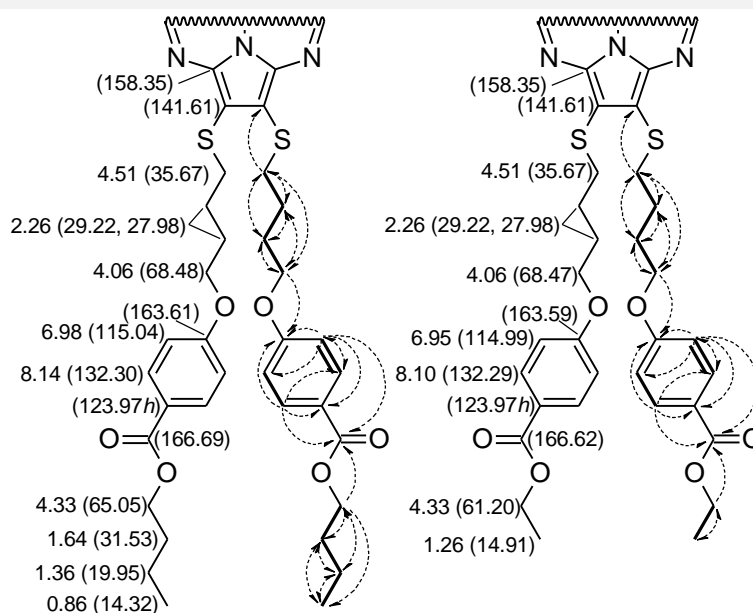

**Fig. S14.**  $^1\text{H}$  and ( $^{13}\text{C}$ ) chemical shift values [ppm] and key correlations observed in NMR spectra of the product of **4** macrocyclization. Bold lines:  $^1\text{H}$ - $^1\text{H}$  COSY; Arrows:  $^1\text{H}$ - $^{13}\text{C}$  HMBC.

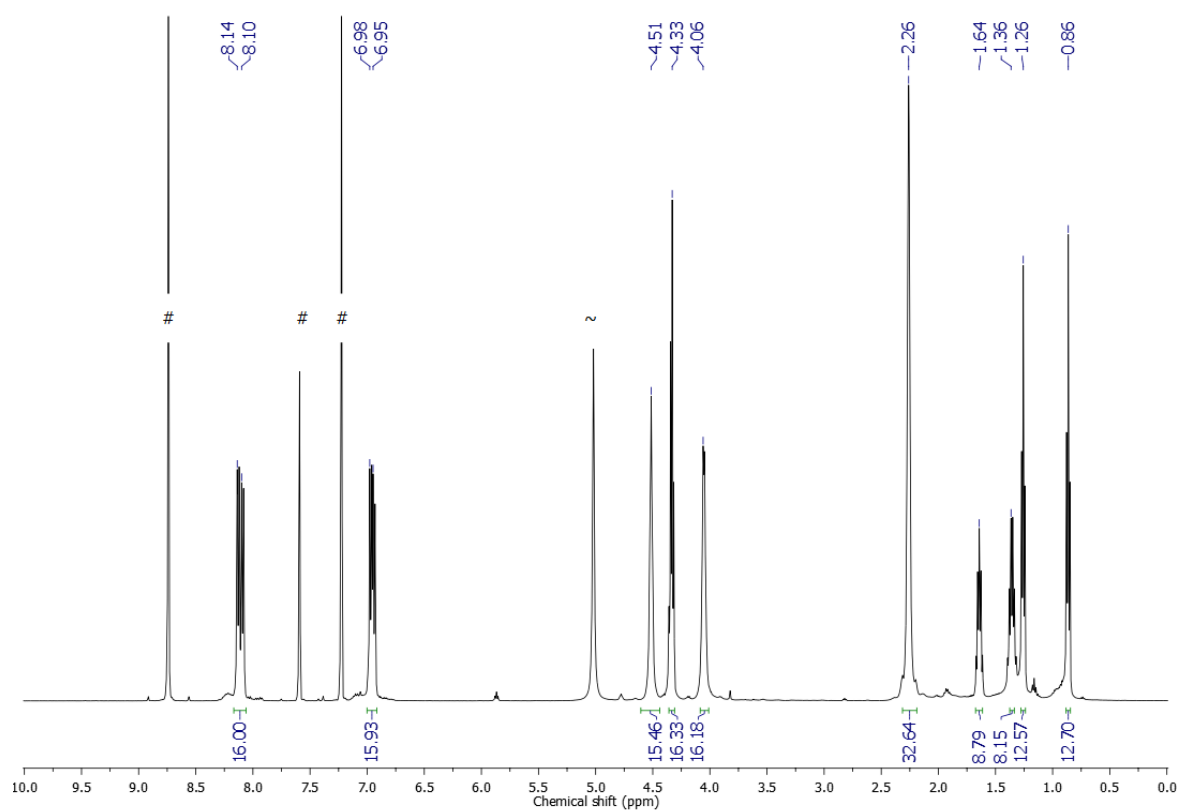

**Fig. S15.**  $^1\text{H}$  NMR spectrum of the product of **4** macrocyclization (500 MHz, pyridine- $d_5$ , 298 K). The symbols # and ~ indicate pyridine- $d_5$  and water residual peaks, respectively.

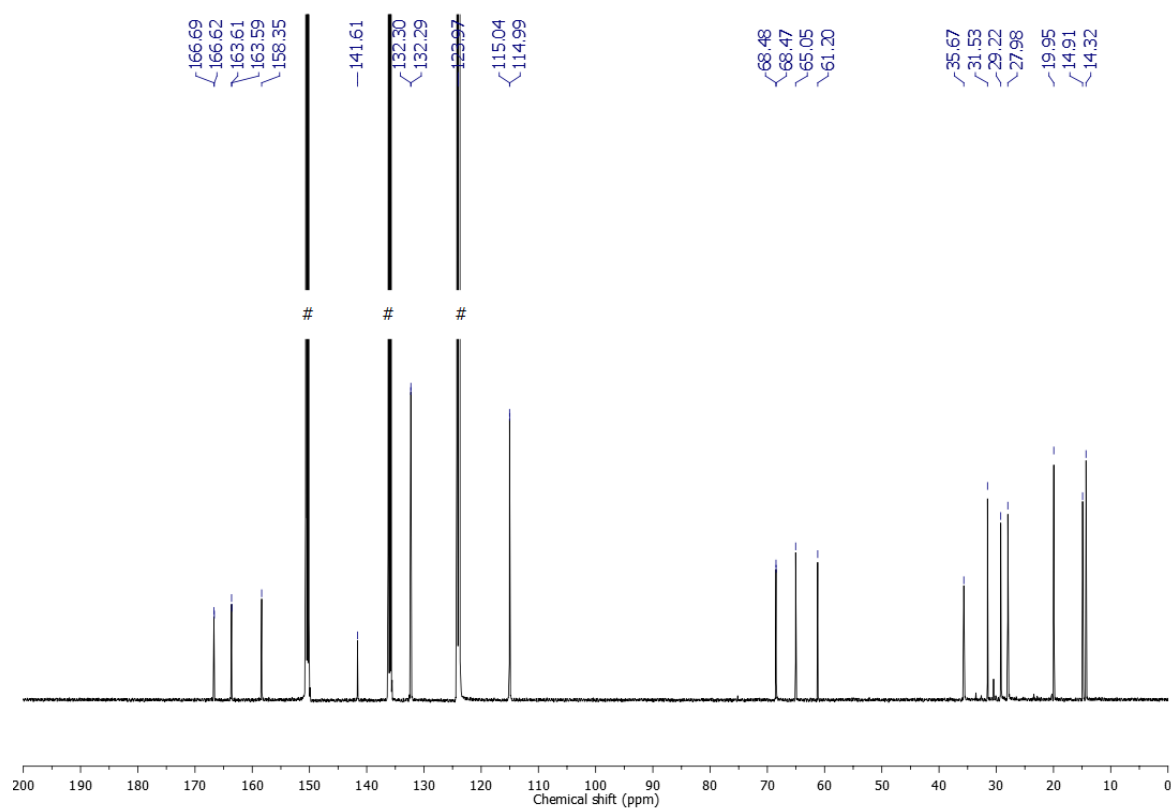

**Fig. S16.**  $^{13}\text{C}$  NMR spectrum recorded for the product of **4** macrocyclization (126 MHz, pyridine- $d_5$ , 298 K). The symbol # indicates pyridine- $d_5$  residual peaks.

## 1.6. NMR data of **5**

**Table S6.**  $^1\text{H}$  and  $^{13}\text{C}$  NMR data obtained for **5** including key correlations determined from  $^1\text{H}$ – $^1\text{H}$  COSY,  $^1\text{H}$ – $^{13}\text{C}$  HSQC and  $^1\text{H}$ – $^{13}\text{C}$  HMBC spectra.

| $\delta_{\text{H}}$<br>(ppm) | Multiplicity<br>( $J_{\text{H-H}}$ in Hz) | $^1\text{H}$ – $^1\text{H}$ COSY<br>$\delta_{\text{H}}$ (ppm) | $^1\text{H}$ – $^{13}\text{C}$ HSQC<br>$\delta_{\text{C}}$ (ppm) | $^1\text{H}$ – $^{13}\text{C}$ HMBC<br>$\delta_{\text{C}}$ (ppm) |       |       |       |
|------------------------------|-------------------------------------------|---------------------------------------------------------------|------------------------------------------------------------------|------------------------------------------------------------------|-------|-------|-------|
| 8.18                         | m                                         | 7.16                                                          | 132.4                                                            | 166.8<br>115.4                                                   | 163.6 | 132.4 | 123.8 |
| 7.16                         | m                                         | 8.18                                                          | 115.4                                                            | 166.8<br>115.4                                                   | 163.6 | 132.4 | 123.8 |
| 5.51                         | t (7.5)                                   | 2.41                                                          | 61.3                                                             | 29.4                                                             | 26.5  |       |       |
| 4.33                         | t (6.5)                                   | 1.64                                                          | 65.1                                                             | 166.6                                                            | 31.5  | 20.0  |       |
| 4.17                         | t (6.5)                                   | 2.04                                                          | 68.4                                                             | 163.6                                                            | 29.4  | 26.5  |       |
| 2.41                         | m                                         | 5.51 2.04                                                     | 29.4                                                             | 68.4                                                             | 61.3  | 26.5  |       |
| 2.04                         | m                                         | 4.17 2.41                                                     | 26.5                                                             | 68.4                                                             | 61.4  | 29.4  |       |
| 1.64                         | m                                         | 4.33 1.35                                                     | 31.5                                                             | 65.1                                                             | 20.0  | 14.3  |       |
| 1.35                         | m                                         | 1.64 0.86                                                     | 20.0                                                             | 65.1                                                             | 31.5  | 14.3  |       |
| 0.86                         | t (7.5)                                   | 1.35                                                          | 14.3                                                             | 31.5                                                             | 20.0  |       |       |

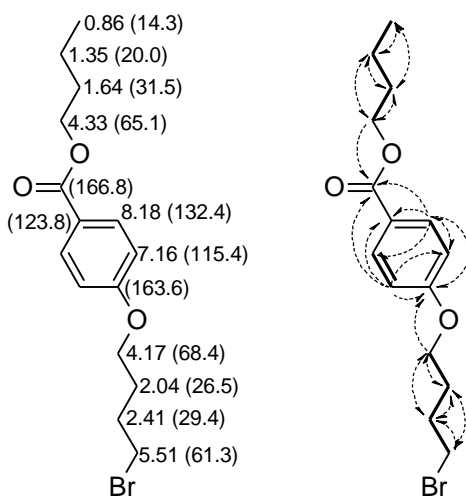

**Fig. S17.**  $^1\text{H}$  and ( $^{13}\text{C}$ ) chemical shift values [ppm] and key correlations observed in NMR spectra of **5**.  
Bold lines:  $^1\text{H}$ – $^1\text{H}$  COSY; Arrows:  $^1\text{H}$ – $^{13}\text{C}$  HMBC.

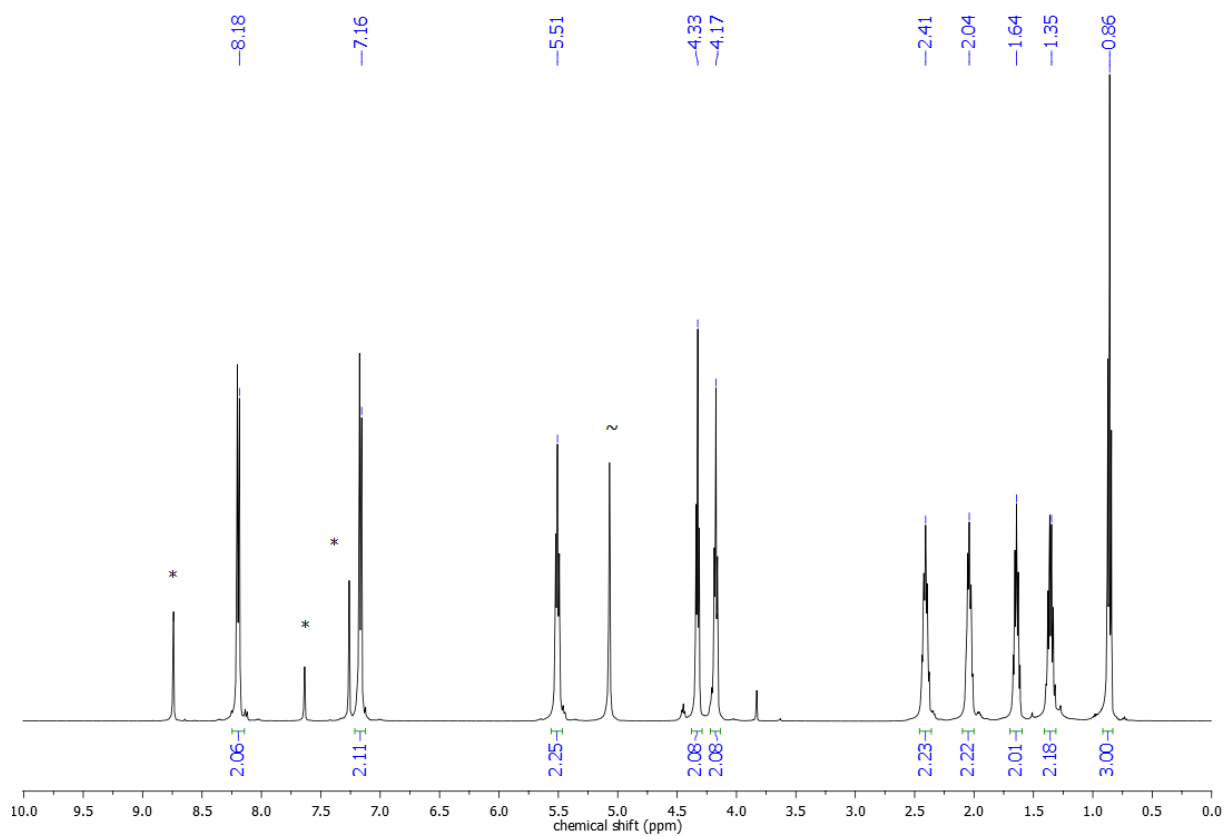

**Fig. S18.**  $^1\text{H}$  NMR spectrum of **5** (500 MHz, pyridine- $d_5$ , 298 K). The symbols \* and ~ indicate pyridine- $d_5$  and water residual peaks, respectively.

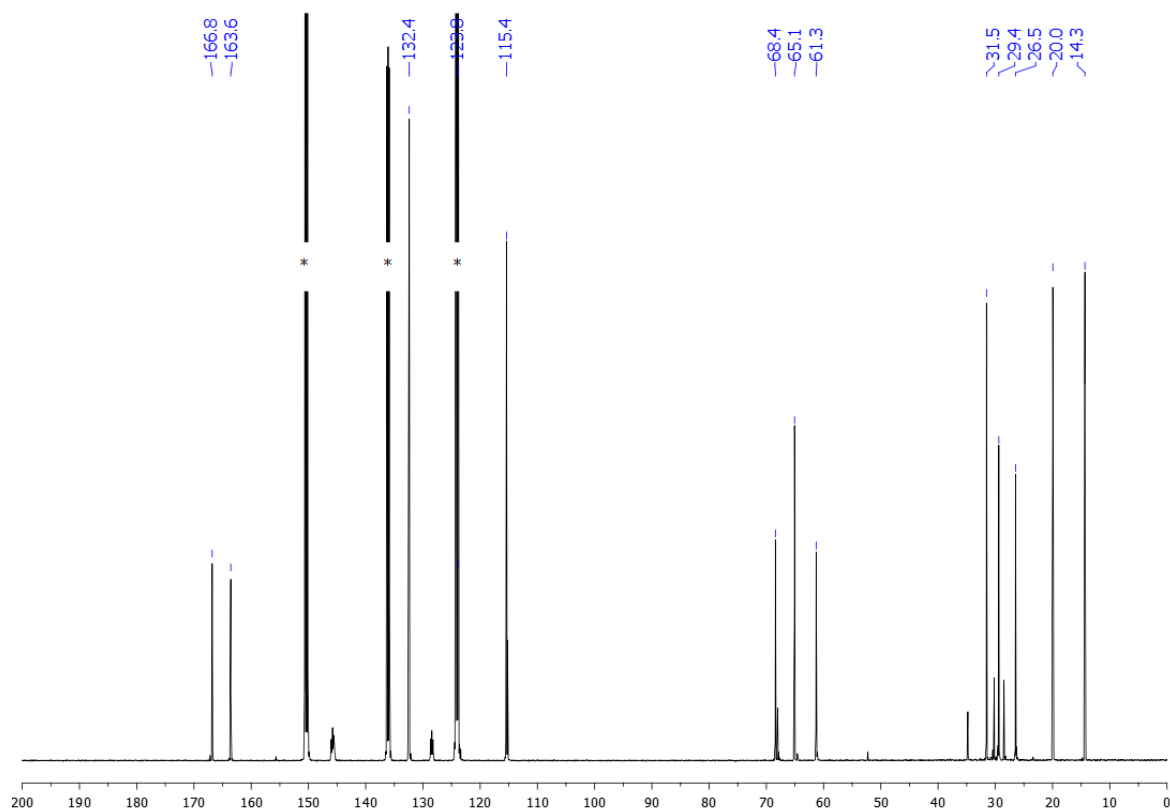

**Fig. S19.**  $^{13}\text{C}$  NMR spectrum recorded for **5** (126 MHz, pyridine- $d_5$ , 298 K). The symbol \* indicates pyridine- $d_5$  residual peak.

## 1.7. NMR data of **5D**

**Table S7.**  $^1\text{H}$  and  $^{13}\text{C}$  NMR data obtained for **5D** including key correlations determined from  $^1\text{H}$ – $^1\text{H}$  COSY,  $^1\text{H}$ – $^{13}\text{C}$  HSQC and  $^1\text{H}$ – $^{13}\text{C}$  HMBC spectra.

| $\delta_{\text{H}}$<br>(ppm) | Multiplicity<br>( $J_{\text{H-H}}$ in Hz) | $^1\text{H}$ – $^1\text{H}$ COSY<br>$\delta_{\text{H}}$ (ppm) | $^1\text{H}$ – $^{13}\text{C}$ HSQC<br>$\delta_{\text{C}}$ (ppm) | $^1\text{H}$ – $^{13}\text{C}$ HMBC<br>$\delta_{\text{C}}$ (ppm) |       |       |       |
|------------------------------|-------------------------------------------|---------------------------------------------------------------|------------------------------------------------------------------|------------------------------------------------------------------|-------|-------|-------|
| 7.85                         | m                                         | 7.00                                                          | 131.2                                                            | 165.5                                                            | 162.5 | 131.2 | 114.5 |
| 7.00                         | m                                         | 7.85                                                          | 114.5                                                            | 165.5                                                            | 162.5 | 122.0 | 114.5 |
| 4.20                         | t (6.5)                                   | 1.64                                                          | 64.0                                                             | 165.5                                                            | 122.0 | 30.3  | 18.8  |
| 4.09                         | bs                                        | 1.87                                                          | 67.5                                                             | 162.5                                                            | 67.5  | 25.2  |       |
| 1.87                         | bs                                        | 4.09                                                          | 25.2                                                             | 67.5                                                             | 25.2  |       |       |
| 1.64                         | m                                         | 4.20 1.37                                                     | 30.3                                                             | 64.0                                                             | 18.8  | 13.6  |       |
| 1.37                         | m                                         | 1.64 0.90                                                     | 18.8                                                             | 64.0                                                             | 30.3  | 13.6  |       |
| 0.90                         | t (7.5)                                   | 1.37                                                          | 13.6                                                             | 30.3                                                             | 18.8  |       |       |

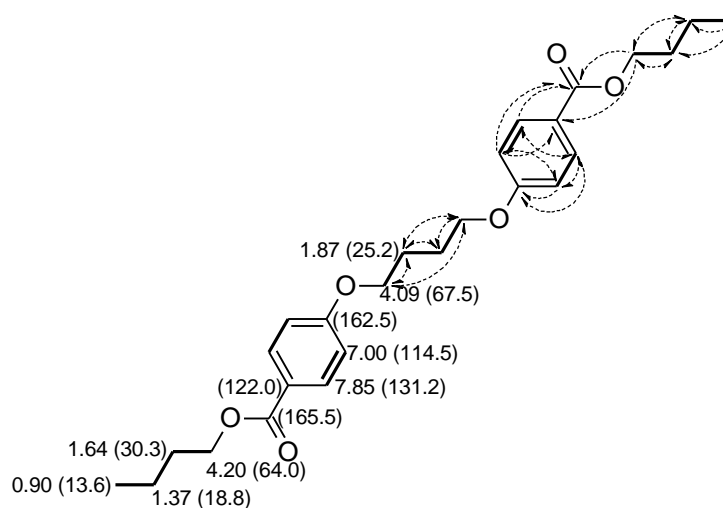

**Fig. S20.**  $^1\text{H}$  and ( $^{13}\text{C}$ ) chemical shift values [ppm] and key correlations observed in NMR spectra of **5D**. Bold lines:  $^1\text{H}$ – $^1\text{H}$  COSY; Arrows:  $^1\text{H}$ – $^{13}\text{C}$  HMBC.



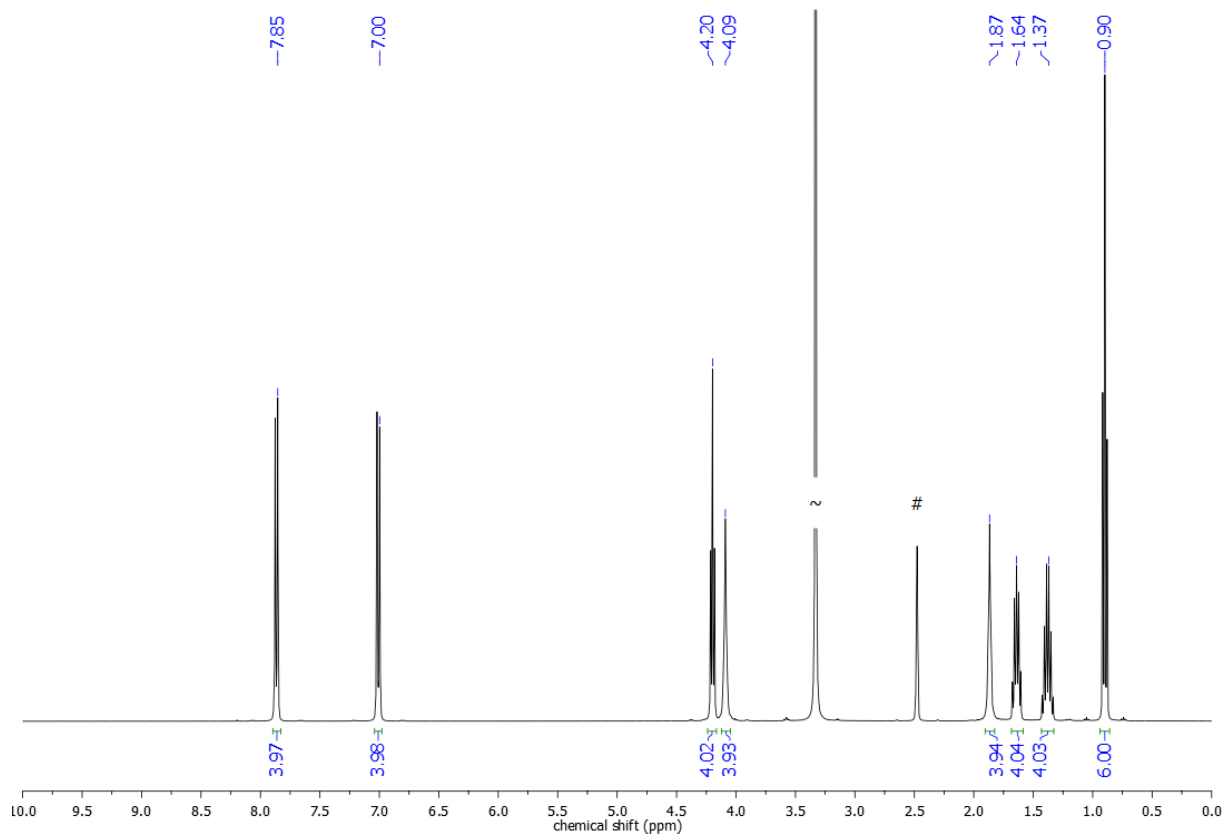

**Fig. S21.**  $^1\text{H}$  NMR spectrum of **5D** (400 MHz,  $\text{DMSO-}d_6$ , 298 K). The symbols # and ~ indicate  $\text{DMSO-}d_6$  and water residual peaks, respectively.

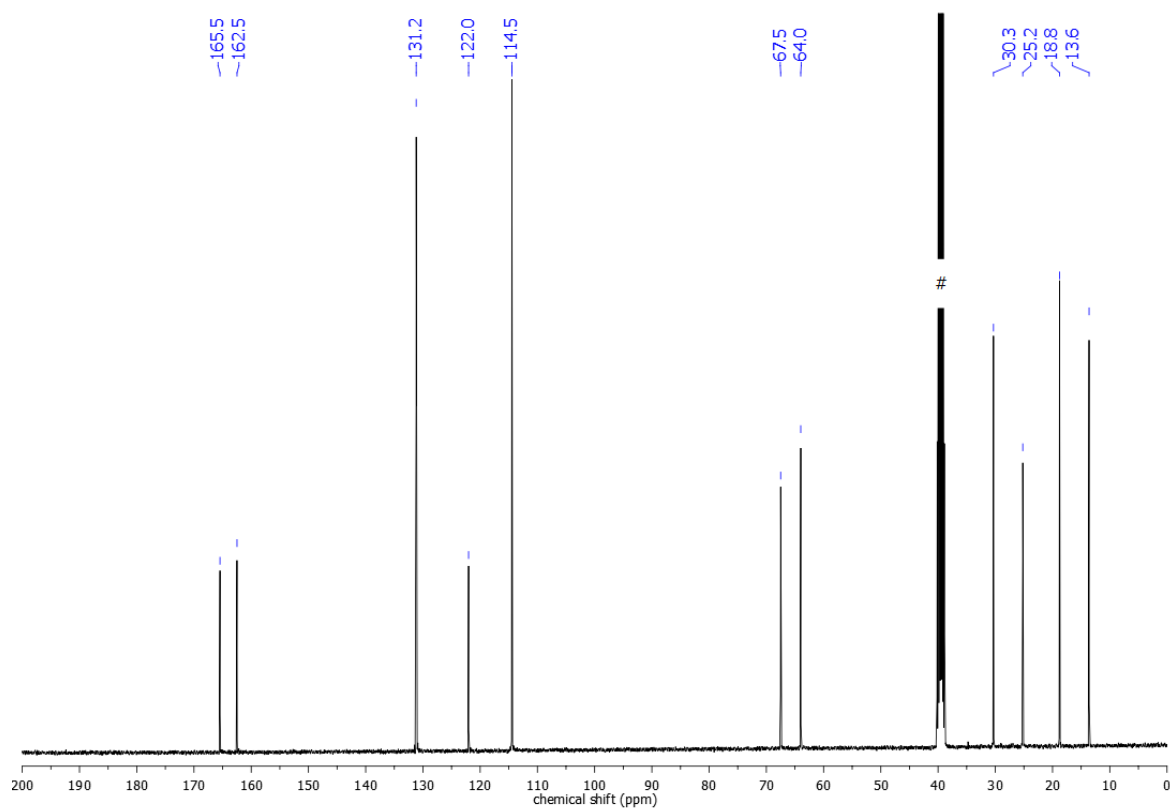

**Fig. S22.**  $^{13}\text{C}$  NMR spectrum recorded for **5D** (101 MHz,  $\text{DMSO-}d_6$ , 298 K). The symbol # indicates  $\text{DMSO-}d_6$  residual peak.

## 1.8. NMR data of 6

**Table S8.**  $^1\text{H}$  and  $^{13}\text{C}$  NMR data obtained for **6** including key correlations determined from  $^1\text{H}$ – $^1\text{H}$  COSY,  $^1\text{H}$ – $^{13}\text{C}$  HSQC and  $^1\text{H}$ – $^{13}\text{C}$  HMBC spectra.

| $\delta_{\text{H}}$<br>(ppm)     | Multiplicity<br>( $J_{\text{H-H}}$ in Hz) | $^1\text{H}$ – $^1\text{H}$ COSY<br>$\delta_{\text{H}}$ (ppm) | $^1\text{H}$ – $^{13}\text{C}$ HSQC<br>$\delta_{\text{C}}$ (ppm) | $^1\text{H}$ – $^{13}\text{C}$ HMBC<br>$\delta_{\text{C}}$ (ppm) |       |       |       |
|----------------------------------|-------------------------------------------|---------------------------------------------------------------|------------------------------------------------------------------|------------------------------------------------------------------|-------|-------|-------|
| 7.88                             | m                                         | 7.00                                                          | 131.0                                                            | 165.4<br>114.3                                                   | 162.3 | 131.0 | 122.0 |
| 7.00                             | m                                         | 7.88                                                          | 114.3                                                            | 165.4<br>114.3                                                   | 162.3 | 131.0 | 122.0 |
| 4.22                             | t (6.5)                                   | 1.67                                                          | 63.9                                                             | 165.4                                                            | 122.0 | 30.3  | 18.7  |
| 4.07                             | t (5.5)                                   | 1.83                                                          | 67.1                                                             | 162.3                                                            | 27.1  | 26.1  |       |
| 3.25                             | t (6.5)                                   | 1.83                                                          | 34.1                                                             | 121.2                                                            | 67.1  | 27.1  | 26.1  |
| 1.83                             | m                                         | 4.07 3.25 1.83                                                | 27.1 26.1                                                        | 67.1                                                             | 34.1  | 27.1  | 26.1  |
| 1.67                             | m                                         | 4.22 1.40                                                     | 30.3                                                             | 63.9                                                             | 18.7  | 13.6  |       |
| 1.40                             | m                                         | 1.67 0.92                                                     | 18.7                                                             | 63.9                                                             | 30.3  | 13.6  |       |
| 0.92                             | t (7.5)                                   | 1.40                                                          | 13.6                                                             | 30.3                                                             | 18.7  |       |       |
| Other carbon atoms (ppm): 112.4. |                                           |                                                               |                                                                  |                                                                  |       |       |       |

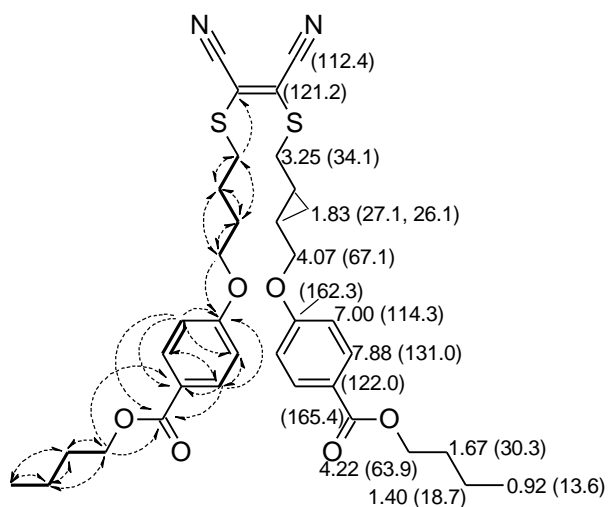

**Fig. S23.**  $^1\text{H}$  and ( $^{13}\text{C}$ ) chemical shift values [ppm] and key correlations observed in NMR spectra of **6**.  
Bold lines:  $^1\text{H}$ – $^1\text{H}$  COSY; Arrows:  $^1\text{H}$ – $^{13}\text{C}$  HMBC.

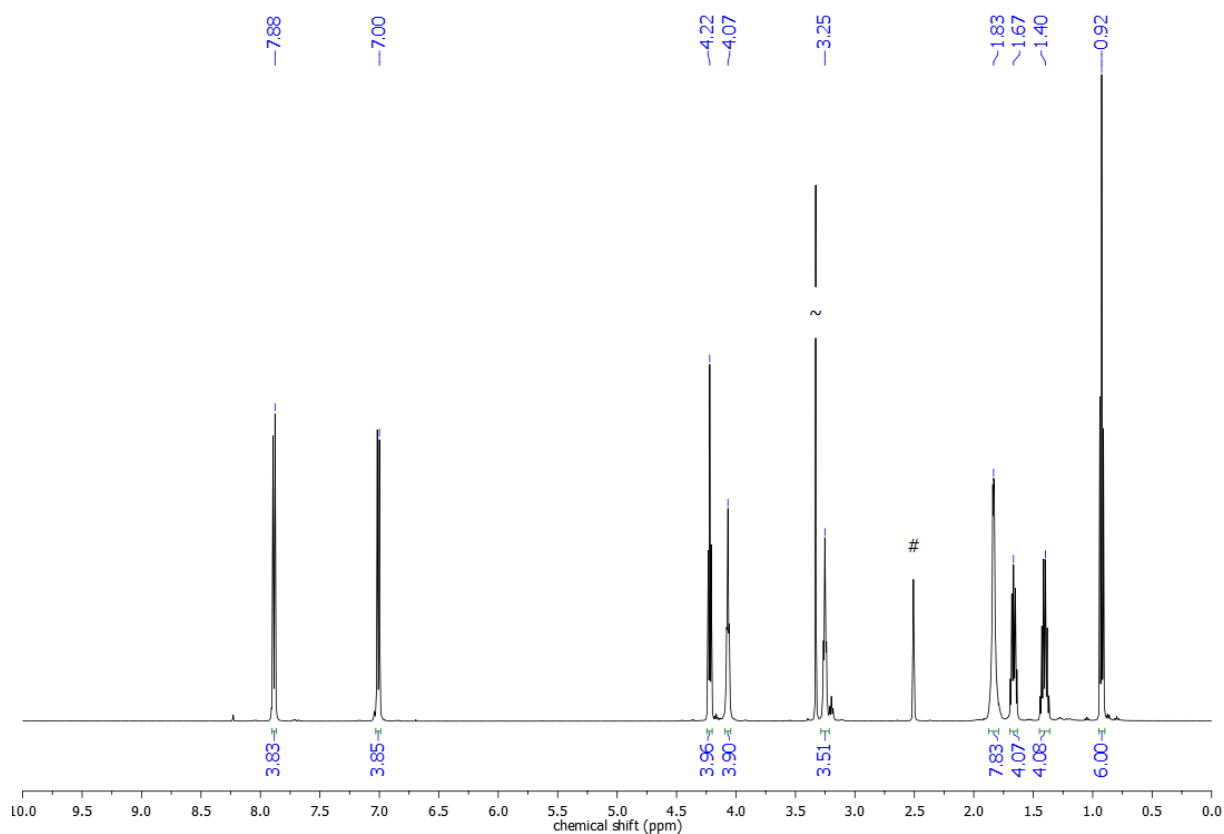

**Fig. S24.**  $^1\text{H}$  NMR spectrum of **6** (500 MHz,  $\text{DMSO-}d_6$ , 298 K). The symbols # and ~ indicate  $\text{DMSO-}d_6$  and water residual peaks, respectively.

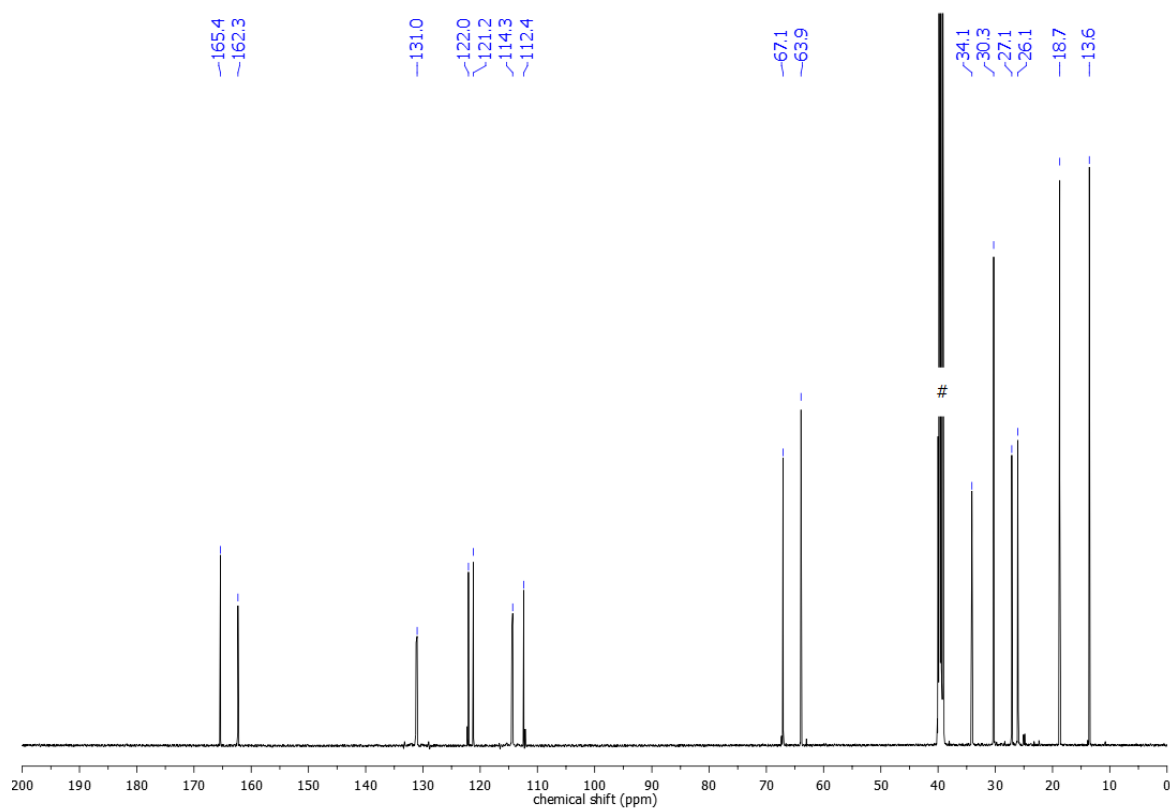

**Fig. S25.**  $^{13}\text{C}$  NMR spectrum recorded for **6** (126 MHz,  $\text{DMSO-}d_6$ , 298 K). The symbol # indicates  $\text{DMSO-}d_6$  residual peak.

## 1.9. NMR data of **7**

**Table S9.**  $^1\text{H}$  and  $^{13}\text{C}$  NMR data obtained for **7** including key correlations determined from  $^1\text{H}$ – $^1\text{H}$  COSY,  $^1\text{H}$ – $^{13}\text{C}$  HSQC and  $^1\text{H}$ – $^{13}\text{C}$  HMBC spectra.

| $\delta_{\text{H}}$<br>(ppm)     | Multiplicity<br>( $J_{\text{H-H}}$ in Hz) | $^1\text{H}$ – $^1\text{H}$ COSY<br>$\delta_{\text{H}}$ (ppm) | $^1\text{H}$ – $^{13}\text{C}$ HSQC<br>$\delta_{\text{C}}$ (ppm) | $^1\text{H}$ – $^{13}\text{C}$ HMBC<br>$\delta_{\text{C}}$ (ppm) |       |       |       |
|----------------------------------|-------------------------------------------|---------------------------------------------------------------|------------------------------------------------------------------|------------------------------------------------------------------|-------|-------|-------|
| 7.87                             | m                                         | 6.99                                                          | 131.0                                                            | 165.4<br>114.3                                                   | 162.3 | 131.0 | 122.0 |
| 6.99                             | m                                         | 7.87                                                          | 114.4                                                            | 165.4<br>114.3                                                   | 162.3 | 131.0 | 122.0 |
| 4.21                             | t (6.5)                                   | 1.66                                                          | 63.9                                                             | 165.4                                                            | 122.0 | 30.3  | 18.7  |
| 4.06                             | t (5.5)                                   | 1.83                                                          | 67.1                                                             | 162.3                                                            | 27.1  | 26.1  |       |
| 3.24                             | t (6.5)                                   | 1.83                                                          | 34.1                                                             | 121.2                                                            | 27.1  | 26.1  |       |
| 1.83                             | m                                         | 4.06 3.24                                                     | 27.1 26.1                                                        | 67.1                                                             | 34.1  | 27.1  | 26.1  |
| 1.66                             | m                                         | 4.21 1.39                                                     | 30.3                                                             | 63.9                                                             | 18.7  | 13.6  |       |
| 1.39                             | m                                         | 1.66 0.92                                                     | 18.7                                                             | 63.9                                                             | 30.3  | 13.6  |       |
| 0.92                             | t (7.5)                                   | 1.39                                                          | 13.6                                                             | 30.3                                                             | 18.7  |       |       |
| Other carbon atoms (ppm): 112.4. |                                           |                                                               |                                                                  |                                                                  |       |       |       |

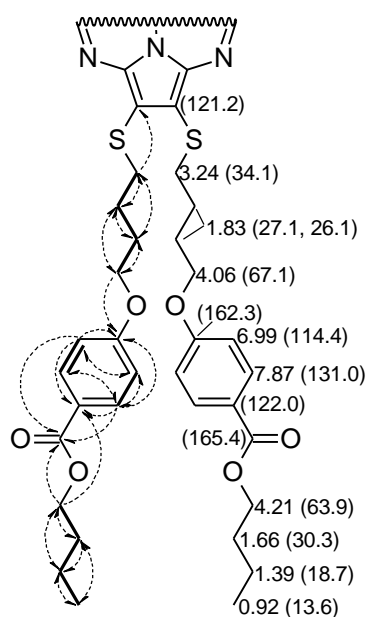

**Fig. S26.**  $^1\text{H}$  and ( $^{13}\text{C}$ ) chemical shift values [ppm] and key correlations observed in NMR spectra of **7**.  
Bold lines:  $^1\text{H}$ – $^1\text{H}$  COSY; Arrows:  $^1\text{H}$ – $^{13}\text{C}$  HMBC.

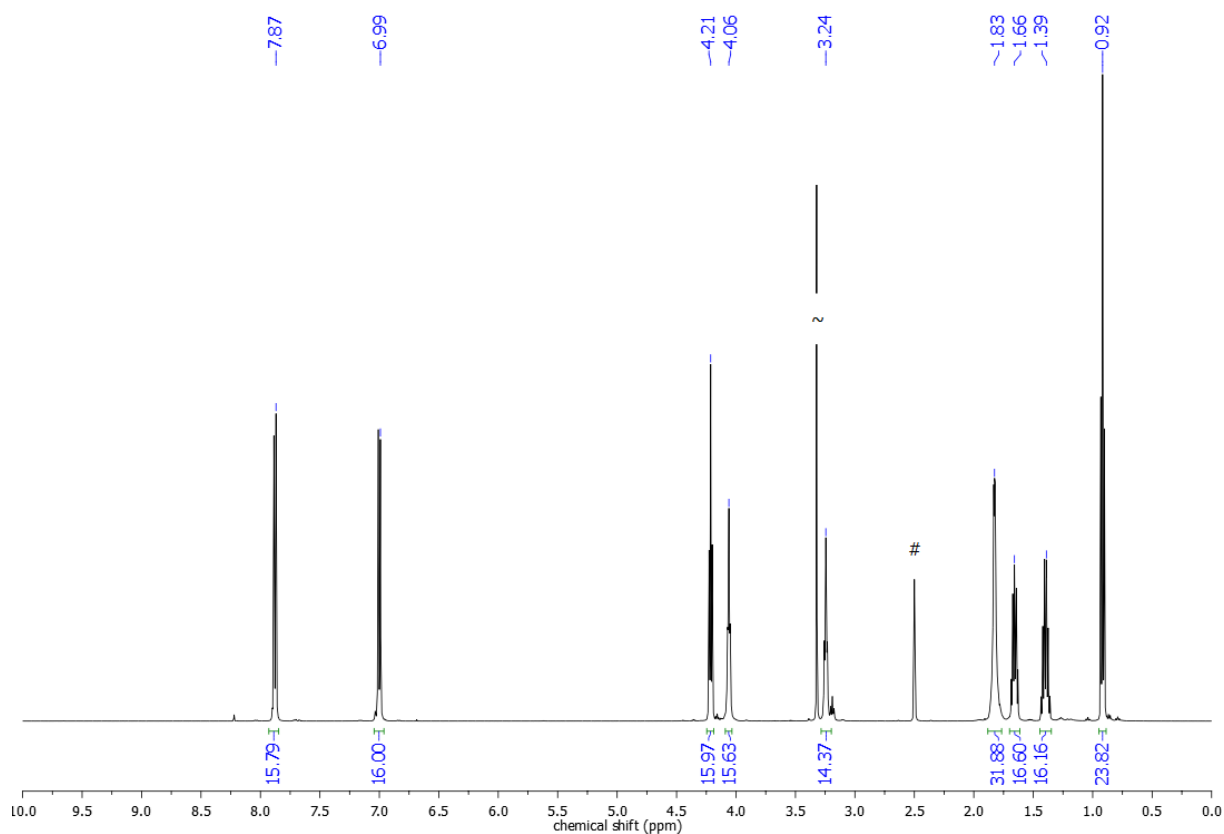

**Fig. S27.**  $^1\text{H}$  NMR spectrum of **7** (500 MHz,  $\text{DMSO-}d_6$ , 298 K). The symbols # and ~ indicate  $\text{DMSO-}d_6$  and water residual peaks, respectively.

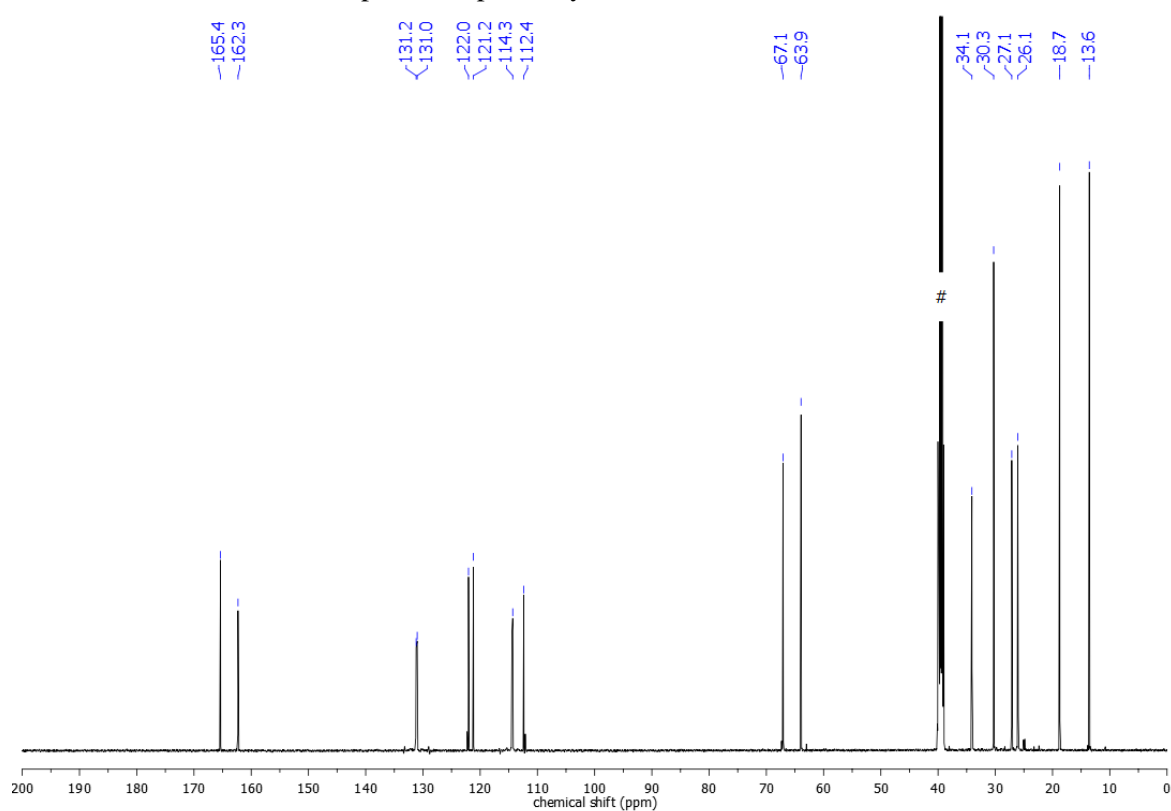

**Fig. S28.**  $^{13}\text{C}$  NMR spectrum recorded for **7** (126 MHz,  $\text{DMSO-}d_6$ , 298 K). The symbol # indicates  $\text{DMSO-}d_6$  residual peak.

### 1.10. NMR data of **8**

**Table S10.**  $^1\text{H}$  and  $^{13}\text{C}$  NMR data obtained for **8** including key correlations determined from  $^1\text{H}$ – $^1\text{H}$  COSY,  $^1\text{H}$ – $^{13}\text{C}$  HSQC and  $^1\text{H}$ – $^{13}\text{C}$  HMBC spectra.

| $\delta_{\text{H}}$<br>(ppm)     | Multiplicity<br>( $J_{\text{H-H}}$ in Hz) | $^1\text{H}$ – $^1\text{H}$ COSY<br>$\delta_{\text{H}}$ (ppm) | $^1\text{H}$ – $^{13}\text{C}$ HSQC<br>$\delta_{\text{C}}$ (ppm) | $^1\text{H}$ – $^{13}\text{C}$ HMBC<br>$\delta_{\text{C}}$ (ppm) |       |       |       |
|----------------------------------|-------------------------------------------|---------------------------------------------------------------|------------------------------------------------------------------|------------------------------------------------------------------|-------|-------|-------|
| 7.85                             | m                                         | 7.00                                                          | 131.2                                                            | 165.4                                                            | 162.4 | 131.2 | 114.4 |
| 7.59                             | s                                         | 7.59                                                          | 120.5                                                            | 154.8                                                            | 120.5 | 113.6 |       |
| 7.00                             | m                                         | 7.85                                                          | 114.4                                                            | 165.4                                                            | 162.4 | 122.0 | 114.4 |
| 4.20                             | m                                         | 1.89 1.65                                                     | 69.4 64.0                                                        | 165.4<br>18.8                                                    | 154.8 | 30.5  | 25.0  |
| 4.12                             | bs                                        | 1.89                                                          | 67.4                                                             | 162.4                                                            | 25.0  |       |       |
| 1.89                             | s                                         | 4.20 4.12                                                     | 25.0                                                             | 69.4                                                             | 67.4  | 25.0  |       |
| 1.65                             | m                                         | 4.20 1.38                                                     | 30.3                                                             | 64.0                                                             | 18.8  | 13.6  |       |
| 1.38                             | m                                         | 1.65 0.90                                                     | 18.8                                                             | 64.0                                                             | 30.3  | 13.6  |       |
| 0.90                             | t (7.5)                                   | 1.38                                                          | 13.6                                                             | 30.3                                                             | 18.8  |       |       |
| Other carbon atoms (ppm): 102.8. |                                           |                                                               |                                                                  |                                                                  |       |       |       |

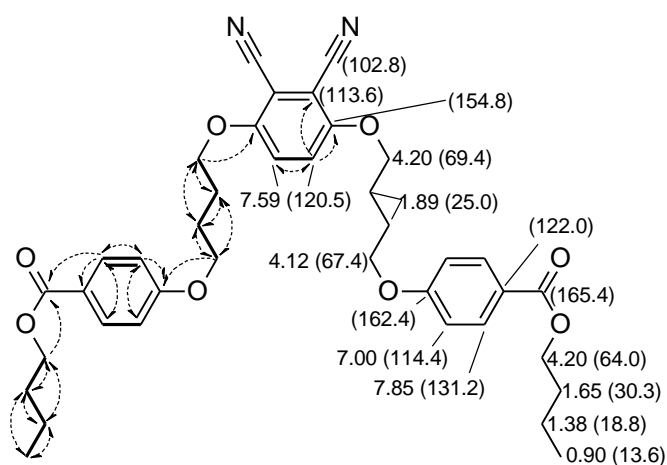

**Fig. S29.**  $^1\text{H}$  and ( $^{13}\text{C}$ ) chemical shift values [ppm] and key correlations observed in NMR spectra of **8**.  
Bold lines:  $^1\text{H}$ – $^1\text{H}$  COSY; Arrows:  $^1\text{H}$ – $^{13}\text{C}$  HMBC.

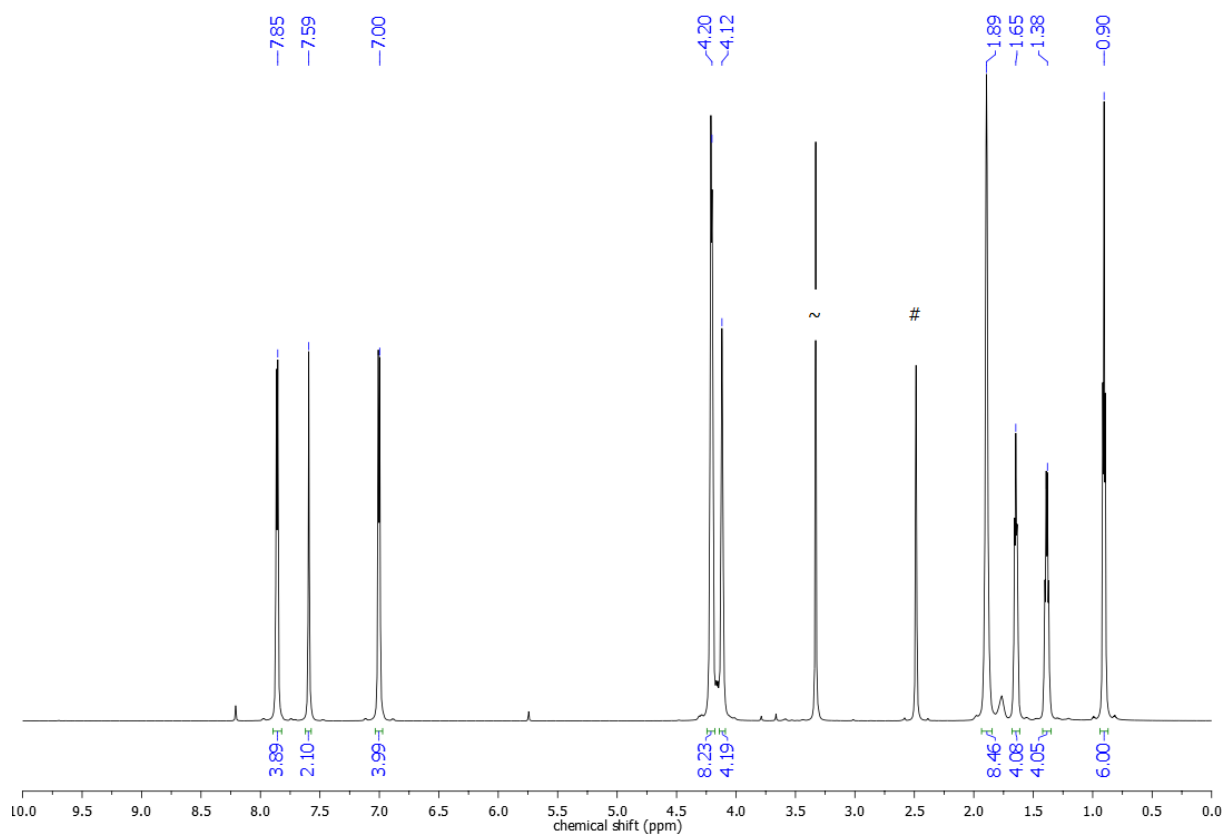

**Fig. S30.**  $^1\text{H}$  NMR spectrum of **8** (700 MHz,  $\text{DMSO-}d_6$ , 298 K). The symbols # and ~ indicate  $\text{DMSO-}d_6$  and water residual peaks, respectively.

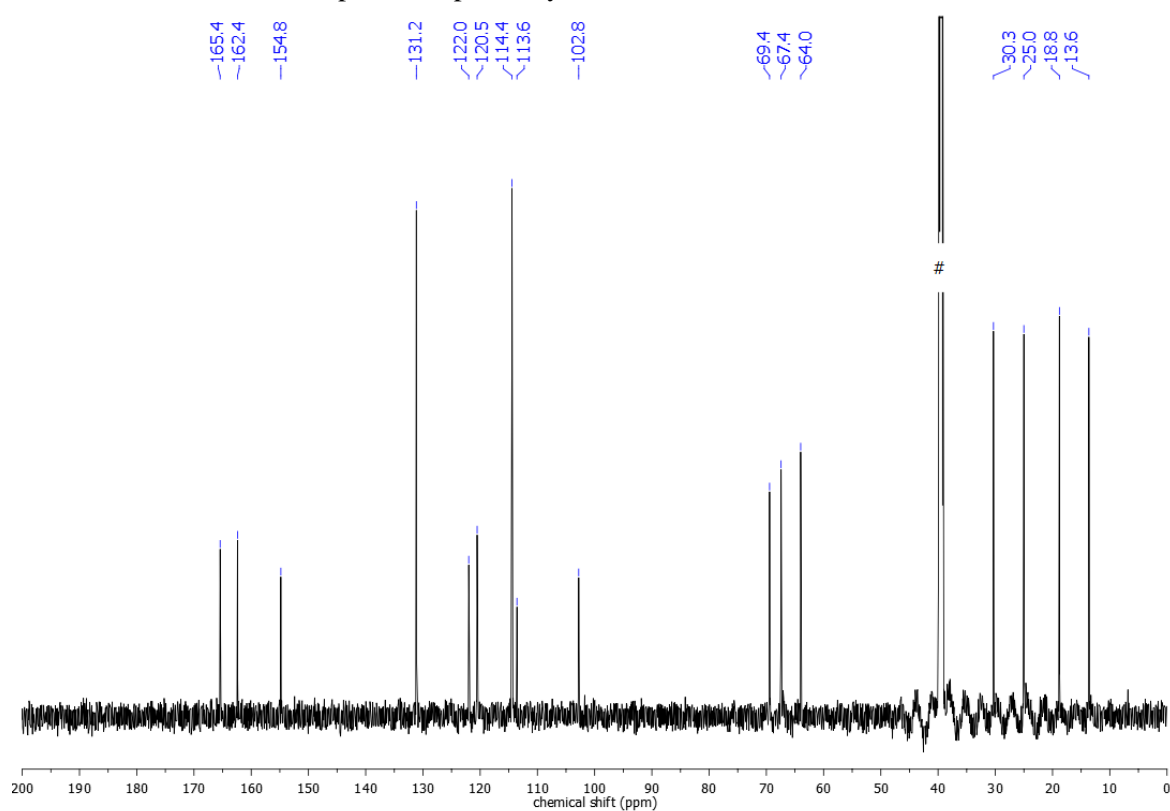

**Fig. S31.**  $^{13}\text{C}$  NMR spectrum recorded for **8** (176 MHz,  $\text{DMSO-}d_6$ , 298 K). The symbol # indicates  $\text{DMSO-}d_6$  residual peak.

### 1.11. HPLC data of 3

Analytical HPLC was carried out on an Agilent 1200 instrument equipped with a DAD detector. The chromatographic separation was achieved on octadecylsilane coated column, 150 mm × 4.6 mm, 5 μm (Eclipse XDB-C18, Agilent) using a linear gradient conditions at a flow rate of 1.0 mL/min in different configurations. Separations was performed at 25°C.

#### 1.11.1. Phases configuration 1

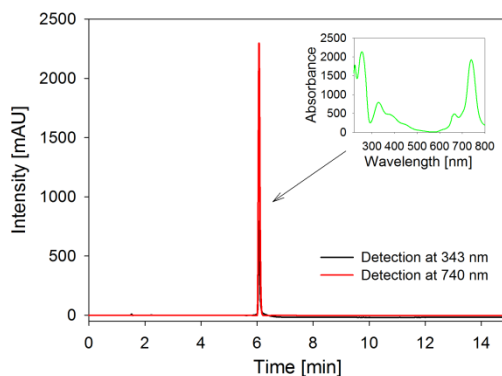

Mobile phase

| Time<br>[min] | MeOH | CH <sub>2</sub> Cl <sub>2</sub> |
|---------------|------|---------------------------------|
| 0             | 100  | 0                               |
| 3             | 100  | 0                               |
| 4             | 0    | 100                             |
| 15            | 0    | 100                             |

|             |                                                   |
|-------------|---------------------------------------------------|
| Flow        | 1.0 ml/min                                        |
| Temperature | 25°C                                              |
| Column      | Agilent, Eclipse XDB-C18<br>150 mm · 4.6 mm, 5 μm |

Detection at  $\lambda = 343$  nm

Detection at  $\lambda = 740$  nm

| Signal | Retention<br>time<br>[min] | Area   | Content<br>[%] | Signal | Retention<br>time<br>[min] | Area   | Content<br>[%] |
|--------|----------------------------|--------|----------------|--------|----------------------------|--------|----------------|
| 1      | 1.53                       | 31.9   | 0.90           | 1      | 5.60                       | 24.6   | 0.29           |
| 2      | 1.60                       | 8.5    | 0.24           | 2      | 6.07                       | 8497.3 | 99.71          |
| 3      | 2.22                       | 10.3   | 0.29           |        |                            |        |                |
| 4      | 6.07                       | 3517.2 | 98.58          |        |                            |        |                |



### 1.11.2. Phases configuration 2

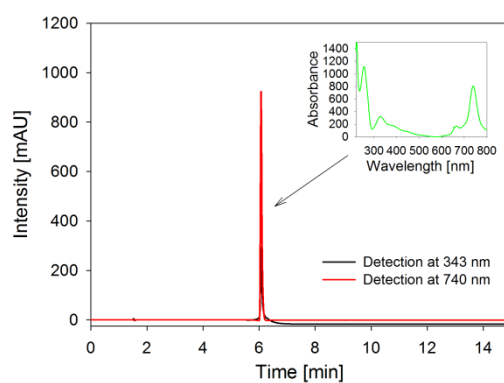

Mobile phase

| Time<br>[min] | MeOH | CH <sub>2</sub> Cl <sub>2</sub> | THF | Flow        | 1.0 ml/min               |
|---------------|------|---------------------------------|-----|-------------|--------------------------|
| 0             | 100  | 0                               | 0   | Temperature | 25°C                     |
| 3             | 100  | 0                               | 0   | Column      | Agilent, Eclipse XDB-C18 |
| 4             | 0    | 95                              | 5   |             | 150 mm · 4.6 mm, 5 µm    |
| 15            | 0    | 95                              | 5   |             |                          |

Detection at  $\lambda = 343$  nm

Detection at  $\lambda = 740$  nm

| Signal | Retention<br>time<br>[min] | Area   | Content<br>[%] | Signal | Retention<br>time<br>[min] | Area   | Content<br>[%] |
|--------|----------------------------|--------|----------------|--------|----------------------------|--------|----------------|
| 1      | 1.53                       | 20.3   | 1.21           | 1      | 5.60                       | 26.9   | 0.79           |
| 2      | 6.07                       | 1652.2 | 98.79          | 2      | 6.07                       | 3393.1 | 99.21          |

### 1.11.3. Phases configuration 3

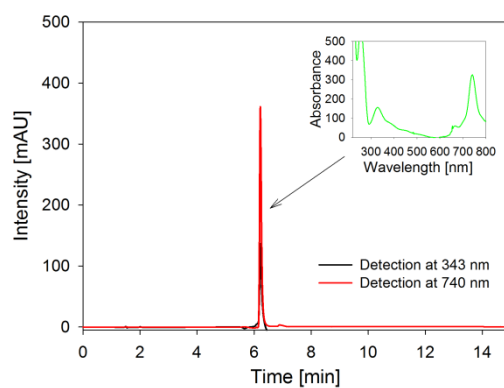

#### Mobile phase

| Time<br>[min] | MeOH | CH <sub>2</sub> Cl <sub>2</sub> |
|---------------|------|---------------------------------|
| 0             | 90   | 10                              |
| 3             | 90   | 10                              |
| 4             | 10   | 90                              |
| 15            | 10   | 90                              |

Flow 1.0 ml/min

Temperature 25°C

Column Agilent, Eclipse XDB-C18  
150 mm · 4.6 mm, 5 µm

Detection at  $\lambda = 343$  nm

Detection at  $\lambda = 740$  nm

| Signal | Retention<br>time<br>[min] | Area   | Content<br>[%] | Signal | Retention<br>time<br>[min] | Area   | Content<br>[%] |
|--------|----------------------------|--------|----------------|--------|----------------------------|--------|----------------|
| 1      | 1.50                       | 6.9    | 0.62           | 1      | 5.65                       | 17.5   | 1.00           |
| 2      | 2.01                       | 5.6    | 0.51           | 2      | 6.22                       | 1706.5 | 97.35          |
| 3      | 6.22                       | 1080.1 | 97.24          | 3      | 6.89                       | 29.0   | 1.65           |
| 4      | 6.89                       | 18.1   | 1.63           |        |                            |        |                |

### 1.12. HPLC data of 7

Analytical HPLC was carried out on an Agilent 1200 instrument equipped with a DAD detector. The chromatographic separation was achieved on octadecylsilane coated column, 150 mm × 4.6 mm, 5 μm (Eclipse XDB-C18, Agilent) using a linear gradient conditions at a flow rate of 1.0 mL/min in different configurations. Separations was performed at 25°C.

#### 1.12.1. Phases configuration 1

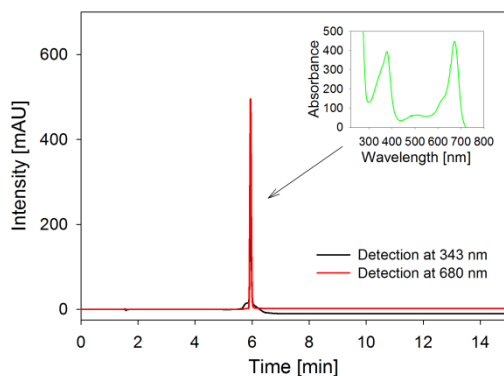

Mobile phase

| Time [min] | MeOH | THF |
|------------|------|-----|
| 0          | 100  | 0   |
| 3          | 100  | 0   |
| 4          | 0    | 100 |
| 15         | 0    | 100 |

Flow 1.0 ml/min

Temperature 25°C

Column Agilent, Eclipse XDB-C18  
150 mm · 4.6 mm, 5 μm

Detection at  $\lambda = 343$  nm

Detection at  $\lambda = 680$  nm

| Signal | Retention time [min] | Area   | Content [%] | Signal | Retention time [min] | Area   | Content [%] |
|--------|----------------------|--------|-------------|--------|----------------------|--------|-------------|
| 1      | 1.54                 | 7.8    | 0.49        | 1      | 5.94                 | 1675.2 | 100.00      |
| 2      | 5.95                 | 1574.0 | 99.51       |        |                      |        |             |

### 1.12.2. Phases configuration 2

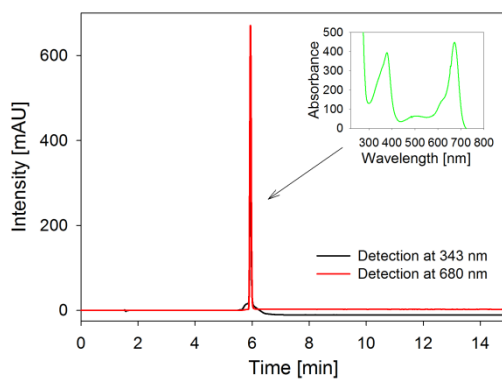

Mobile phase

| Time<br>[min] | MeOH | THF | CH <sub>2</sub> Cl <sub>2</sub> | Flow        | 1.0 ml/min               |
|---------------|------|-----|---------------------------------|-------------|--------------------------|
| 0             | 100  | 0   | 0                               | Temperature | 25°C                     |
| 3             | 100  | 0   | 0                               | Column      | Agilent, Eclipse XDB-C18 |
| 4             | 0    | 95  | 5                               |             | 150 mm · 4.6 mm, 5 μm    |
| 15            | 0    | 95  | 5                               |             |                          |

Detection at  $\lambda = 343$  nm

Detection at  $\lambda = 680$  nm

| Signal | Retention<br>time<br>[min] | Area   | Content<br>[%] | Signal | Retention<br>time<br>[min] | Area   | Content<br>[%] |
|--------|----------------------------|--------|----------------|--------|----------------------------|--------|----------------|
| 1      | 1.53                       | 7.3    | 0.37           | 1      | 5.94                       | 2261.9 | 100.00         |
| 2      | 5.94                       | 1943.3 | 99.63          |        |                            |        |                |

### 1.12.3. Phases configuration 3

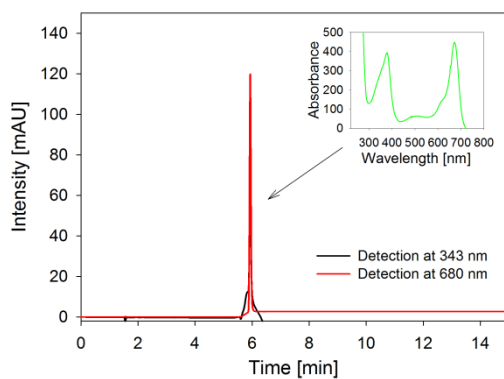

Mobile phase

| Time<br>[min] | MeOH | THF |
|---------------|------|-----|
| 0             | 95   | 5   |
| 3             | 95   | 5   |
| 4             | 5    | 95  |
| 15            | 5    | 95  |

Flow 1.0 ml/min

Temperature 25°C

Column Agilent, Eclipse XDB-C18  
150 mm · 4.6 mm, 5 µm

Detection at  $\lambda = 343$  nm

Detection at  $\lambda = 680$  nm

| Signal | Retention<br>time<br>[min] | Area  | Content<br>[%] | Signal | Retention<br>time<br>[min] | Area  | Content<br>[%] |
|--------|----------------------------|-------|----------------|--------|----------------------------|-------|----------------|
| 1      | 1.59                       | 7.5   | 1.05           | 1      | 5.93                       | 417.8 | 100.00         |
| 2      | 5.93                       | 704.3 | 98.95          |        |                            |       |                |

## 2. Synthetic attempts towards A<sub>3</sub>B type macrocycles.

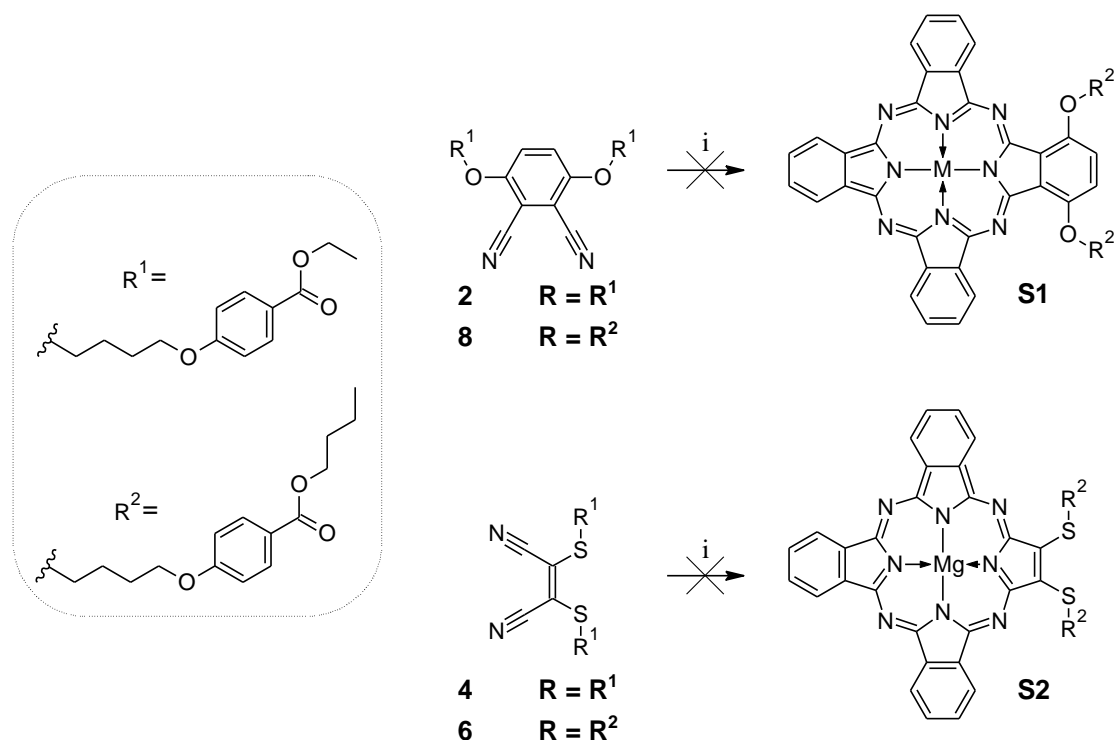

**Fig. S32.** Synthetic approaches towards A<sub>3</sub>B macrocycles: (i) 1,2-dicyanobenzene (tenfold excess), (BuO)<sub>2</sub>Mg, BuOH, reflux, 20h.

### S1 synthesis:

Magnesium turnings (222 mg, 9.16 mmol) were stirred in refluxing butan-1-ol with catalytic amount of iodine for 3 h. After cooling, **4** (1000 mg, 1.665 mmol) and 1,2-dicyanobenzene (2133 mg, 16.65 mmol) were added and the reaction mixture was stirred under reflux for another 20 h in inert gas atmosphere.

After cooling, the reaction mixture was poured on water:methanol 1:1 (v/v) mixture. Formed precipitate was filtered and washed with methanol. After drying, green product was dissolved in DCM and purified by column chromatography using: silica gel and eluents DCM, DCM/MeOH 100:1 (v/v), DCM/MeOH 50:1 (v/v), hexane/ethyl acetate 7:2 (v/v); C<sub>18</sub>-reversed phase silica gel and eluents H<sub>2</sub>O/MeOH 3:1 (v/v), MeOH, DCM/MeOH 20:1 (v/v), DCM/MeOH 1:3 (v/v) to give a deep green film. The methods presented below indicated the presence of macrocyclic isomers.

HRMS (MALDI) *m/z* found: 1064.4164, [M]<sup>+</sup> C<sub>62</sub>H<sub>56</sub>MgN<sub>8</sub>O<sub>8</sub> requires 1064,4072; 1065.4261, [M+H]<sup>+</sup> C<sub>62</sub>H<sub>57</sub>MgN<sub>8</sub>O<sub>8</sub> requires 1065,4150; 1069.3370, [M+Na]<sup>+</sup> C<sub>58</sub>H<sub>54</sub>MgN<sub>8</sub>O<sub>6</sub>S<sub>2</sub>Na requires 1069,3356. Also A<sub>2</sub>B<sub>2</sub> and AB<sub>3</sub> isomers were formed, detectable by MS (found: 1592.6930, [ABAB]<sup>+</sup> or [A<sub>2</sub>B<sub>2</sub>]<sup>+</sup> C<sub>92</sub>H<sub>96</sub>MgN<sub>8</sub>O<sub>16</sub> require 1592.6795; 1593.6926, [ABAB+H]<sup>+</sup> or [A<sub>2</sub>B<sub>2</sub>+H]<sup>+</sup> C<sub>92</sub>H<sub>96</sub>MgN<sub>8</sub>O<sub>16</sub> require 1593.6873).

### S2 synthesis:

Magnesium turnings (120 mg, 4.946 mmol) were stirred in refluxing butan-1-ol with catalytic amount of iodine for 3 h. After cooling, **2** (524 mg, 0.899 mmol) and 1,2-dicyanobenzene (1152 mg, 8.992

mmol) were added and the reaction mixture was stirred under reflux for another 20 h in inert gas atmosphere.

After cooling, solvent was evaporated, and the obtained crude residue was purified by column chromatography using: silica gel and eluents DCM, DCM/MeOH 100:1 (v/v), DCM/MeOH 50:1 (v/v), hexane/ethyl acetate 7:2 (v/v); C<sub>18</sub>-reversed phase silica gel and eluents H<sub>2</sub>O/MeOH 3:1 (v/v), MeOH, DCM/MeOH 20:1 (v/v), DCM/MeOH 1:3 (v/v) to give a deep blue film. The methods presented below indicated the presence of macrocyclic isomers.

HRMS (MALDI) *m/z* found: 1046.3588, [M]<sup>+</sup> C<sub>58</sub>H<sub>54</sub>MgN<sub>8</sub>O<sub>6</sub>S<sub>2</sub> requires 1046.3458; 1047.3581, [M+H]<sup>+</sup> C<sub>58</sub>H<sub>55</sub>MgN<sub>8</sub>O<sub>6</sub>S<sub>2</sub> requires 1047.3536; 1069.3370, [M+Na]<sup>+</sup> C<sub>58</sub>H<sub>54</sub>MgN<sub>8</sub>O<sub>6</sub>S<sub>2</sub>Na requires 1069.3356. Also A<sub>2</sub>B<sub>2</sub> and AB<sub>3</sub> isomers were formed, as detected by MS (found: 1557.5634, [ABAB+H]<sup>+</sup> or [A<sub>2</sub>B<sub>2</sub>+H]<sup>+</sup> C<sub>84</sub>H<sub>92</sub>MgN<sub>8</sub>O<sub>12</sub>S<sub>4</sub> require 1557.5646; 2069.7796, [AB<sub>3</sub>+H]<sup>+</sup> C<sub>110</sub>H<sub>131</sub>MgN<sub>8</sub>O<sub>18</sub>S<sub>6</sub> requires 2067.7756).
